# Supplementary material
Source: Research Square preprint supplement (doi:10.21203/rs.3.rs-9012160/v1)
Supplement: Supplementary file 1 [file 5e718adc7e2f5acf401309b3.pdf]

**Supplementary Materials**  
**Mapper-based topological subtyping of early diuretic  
response in ICU patients with acute heart failure:  
a retrospective study with external validation in  
eICU-CRD**

(Author information as in the main manuscript)

**Overview**

This Supplementary Materials file provides additional methodological details and complete aggregated tables/figures for the isomorphic pipeline applied to the MIMIC-IV (main cohort) and eICU-CRD (external validation) ICU datasets. To comply with data use agreements, no individual-level patient records are disclosed.

# Contents

|                                                                            |           |
|----------------------------------------------------------------------------|-----------|
| <b>S1 Supplementary Methods</b>                                            | <b>5</b>  |
| S1.1 Data sources and ethics . . . . .                                     | 5         |
| S1.2 Time anchoring and analysis windows . . . . .                         | 5         |
| S1.3 Mapper feature set and preprocessing . . . . .                        | 5         |
| S1.4 Cross-database variable harmonization (MIMIC-IV ↔ eICU-CRD) . . . . . | 7         |
| S1.5 Missingness and monitoring density (quality control) . . . . .        | 9         |
| S1.6 Mapper modeling and stability assessment . . . . .                    | 10        |
| S1.7 Outcomes, dynamic patterns, and sensitivity analyses . . . . .        | 10        |
| <b>S2 Supplementary Results: Main cohort</b>                               | <b>11</b> |
| S2.1 Mapper network and branch annotation . . . . .                        | 11        |
| S2.2 Clinical profile (Stage 1 Table 1) . . . . .                          | 11        |
| S2.3 In-hospital mortality . . . . .                                       | 16        |
| S2.4 AKI within 48 hours (AKI48h; KDIGO creatinine proxy) . . . . .        | 18        |
| S2.5 Dynamic response phenotypes . . . . .                                 | 19        |
| S2.6 Robustness and sensitivity analyses . . . . .                         | 20        |
| <b>S3 Supplementary Results: External validation</b>                       | <b>22</b> |
| S3.1 Cohort construction counts . . . . .                                  | 22        |
| S3.2 Mapper network and branch annotation . . . . .                        | 22        |
| S3.3 Clinical profile (Stage 1 Table 1) . . . . .                          | 22        |
| S3.4 In-hospital mortality . . . . .                                       | 28        |
| S3.5 AKI within 48 hours (AKI48h; KDIGO creatinine proxy) . . . . .        | 30        |
| S3.6 Dynamic response phenotypes . . . . .                                 | 31        |
| S3.7 Robustness and sensitivity analyses . . . . .                         | 32        |
| <b>S4 Model Diagnostics</b>                                                | <b>33</b> |
| S4.1 Cox proportional-hazards assumption . . . . .                         | 33        |
| S4.2 Logistic calibration . . . . .                                        | 35        |
| <b>S5 Full model outputs</b>                                               | <b>39</b> |
| S5.1 Main cohort (MIMIC-IV) . . . . .                                      | 39        |
| S5.2 External validation (eICU-CRD) . . . . .                              | 42        |
| <b>S6 Supplementary Appendix: Reference Lists (MIMIC-IV)</b>               | <b>45</b> |
| S6.1 Itemid reference list . . . . .                                       | 45        |
| S6.2 ICD-9 code reference list . . . . .                                   | 46        |

## List of Figures

|    |                                                                                   |    |
|----|-----------------------------------------------------------------------------------|----|
| S1 | Mapper network for the main cohort (MIMIC-IV) with major branch annotations. . .  | 11 |
| S2 | Kaplan–Meier survival curves by major branch in the main cohort (MIMIC-IV). . .   | 17 |
| S3 | Forest plot for branch effects in the multivariable Cox model (MIMIC-IV). . . . . | 18 |
| S4 | Dynamic response trajectories by major branch in the main cohort (MIMIC-IV). . .  | 20 |

|     |                                                                                                                    |    |
|-----|--------------------------------------------------------------------------------------------------------------------|----|
| S5  | Observed-mode vs. zero-filled-mode sensitivity comparison (MIMIC-IV). . . . .                                      | 21 |
| S6  | Mapper network for the external validation cohort (eICU-CRD) with major branch annotations. . . . .                | 22 |
| S7  | Kaplan–Meier survival curves by major branch in external validation (eICU-CRD). . . . .                            | 29 |
| S8  | Forest plot for branch effects in the multivariable Cox model (eICU-CRD external validation). . . . .              | 30 |
| S9  | Dynamic response trajectories by major branch in external validation (eICU-CRD). . . . .                           | 32 |
| S10 | Stability metrics across prespecified sensitivity scenarios in external validation (eICU-CRD). . . . .             | 32 |
| S11 | Cox proportional-hazards assumption test summary for the main cohort (MIMIC-IV). . . . .                           | 35 |
| S12 | Cox proportional-hazards assumption test summary for external validation (eICU-CRD). . . . .                       | 35 |
| S13 | Logistic calibration for in-hospital mortality in the main cohort (MIMIC-IV; out-of-fold predictions). . . . .     | 37 |
| S14 | Logistic calibration for in-hospital mortality in external validation (eICU-CRD; out-of-fold predictions). . . . . | 38 |

## List of Tables

|     |                                                                                                                    |    |
|-----|--------------------------------------------------------------------------------------------------------------------|----|
| S1  | Time anchoring and key analysis windows (both cohorts). . . . .                                                    | 5  |
| S2  | Core Mapper feature set (16 features): definitions, units, and preprocessing. . . . .                              | 5  |
| S3  | Harmonized variable mapping between MIMIC-IV and eICU-CRD for the 16 core Mapper features. . . . .                 | 7  |
| S4  | Missingness and measurement-density quality-control summary for monitored domains used in Mapper features. . . . . | 9  |
| S5  | Optimal Mapper parameters and graph statistics for the main cohort (MIMIC-IV). . . . .                             | 10 |
| S6  | Main cohort (MIMIC-IV): Stage 1 Table 1a (clinical profile; field-level display). . . . .                          | 12 |
| S7  | Main cohort (MIMIC-IV): Stage 1 Table 1b (pairwise standardized mean differences). . . . .                         | 14 |
| S8  | Kaplan–Meier summary by branch (MIMIC-IV). . . . .                                                                 | 16 |
| S9  | AKI48h (creatinine-only KDIGO proxy) by branch (MIMIC-IV). . . . .                                                 | 18 |
| S10 | Dynamic response pattern rates by branch (MIMIC-IV). . . . .                                                       | 19 |
| S11 | Sensitivity scenarios for DEI denominator stabilization and CVP strategy (MIMIC-IV). . . . .                       | 20 |
| S12 | External validation cohort construction counts (eICU-CRD v2.0). . . . .                                            | 22 |
| S13 | External validation (eICU-CRD): Stage 1 Table 1a (clinical profile; field-level display). . . . .                  | 23 |
| S14 | External validation (eICU-CRD): Stage 1 Table 1b (pairwise standardized mean differences). . . . .                 | 26 |
| S15 | Kaplan–Meier summary by branch (eICU-CRD). . . . .                                                                 | 28 |
| S16 | AKI48h (creatinine-only KDIGO proxy) by branch (eICU-CRD). . . . .                                                 | 30 |
| S17 | Dynamic response pattern rates by branch (eICU-CRD). . . . .                                                       | 31 |
| S18 | Cox proportional-hazards assumption test (Schoenfeld residuals; MIMIC-IV). . . . .                                 | 33 |
| S19 | Cox proportional-hazards assumption test (Schoenfeld residuals; eICU-CRD). . . . .                                 | 34 |
| S20 | Logistic calibration metrics (out-of-fold predictions; MIMIC-IV). . . . .                                          | 35 |
| S21 | Logistic calibration metrics (out-of-fold predictions; eICU-CRD). . . . .                                          | 36 |
| S22 | Multivariable Cox model coefficients for in-hospital mortality (MIMIC-IV). . . . .                                 | 39 |
| S23 | Logistic regression odds ratios for in-hospital mortality (MIMIC-IV). . . . .                                      | 40 |

|     |                                                                                    |    |
|-----|------------------------------------------------------------------------------------|----|
| S24 | Adjusted odds ratios for AKI48h (MIMIC-IV). . . . .                                | 41 |
| S25 | Multivariable Cox model coefficients for in-hospital mortality (eICU-CRD). . . . . | 42 |
| S26 | Logistic regression odds ratios for in-hospital mortality (eICU-CRD). . . . .      | 43 |
| S27 | Adjusted odds ratios for AKI48h (eICU-CRD). . . . .                                | 44 |
| S28 | MIMIC-IV itemid reference list used in feature extraction. . . . .                 | 45 |
| S29 | MIMIC-IV ICD code reference list used in cohort construction. . . . .              | 46 |

# S1 Supplementary Methods

## S1.1 Data sources and ethics

The main cohort was derived from MIMIC-IV v3.1; the external validation cohort was derived from eICU-CRD v2.0. Both databases are de-identified and accessed under the corresponding data use agreements.

## S1.2 Time anchoring and analysis windows

The analysis is anchored at  $t_0$ , defined as the first eligible intravenous loop diuretic dose administered within 24 hours after ICU admission. Relative to  $t_0$ , we defined early urine-output response windows (0–2h, 0–6h, 0–12h), baseline vital-sign windows ( $t_0$ -6h to  $t_0$ +2h), baseline laboratory windows ( $t_0$ -24h to  $t_0$ +6h), and AKI follow-up ( $t_0$  to  $t_0$ +48h).

Table S1: Time anchoring and key analysis windows (both cohorts).

| Component                  | Definition                                                            |
|----------------------------|-----------------------------------------------------------------------|
| Anchor time ( $t_0$ )      | First eligible IV loop diuretic dose within 24h after ICU admission   |
| Urine-output / DEI windows | 0–2h, 0–6h, 0–12h after $t_0$                                         |
| Vital-sign baseline        | $t_0$ -6h to $t_0$ +2h (closest value; window median when applicable) |
| Laboratory baseline        | $t_0$ -24h to $t_0$ +6h (closest value)                               |
| AKI48h follow-up           | $t_0$ to $t_0$ +48h (max creatinine; creatinine-only KDIGO proxy)     |

## S1.3 Mapper feature set and preprocessing

The core Mapper model uses the same 16 features in both cohorts. Skewed non-negative variables are transformed by  $\log(1 + x)$ ; missing values are handled via prespecified imputation strategies (main protocol: MICE); features are scaled with `RobustScaler`. The complete feature dictionary is provided in Table S2.

Table S2: Core Mapper feature set (16 features): definitions, units, and preprocessing.

| Feature (column name)         | Definition (brief)                                                             | Unit  | Transform / imputation               | Note                                                   |
|-------------------------------|--------------------------------------------------------------------------------|-------|--------------------------------------|--------------------------------------------------------|
| dei_2h_zero_filled_ml_per_mg  | DEI in 0–2h after $t_0$ (urine output / first-dose loop diuretic; zero-filled) | mL/mg | log1p; MICE/median/KNN; RobustScaler | Observed-mode DEI used in sensitivity checks           |
| dei_6h_zero_filled_ml_per_mg  | DEI in 0–6h after $t_0$ (zero-filled)                                          | mL/mg | log1p; impute; scale                 | Also used in some 2D lenses                            |
| dei_12h_zero_filled_ml_per_mg | DEI in 0–12h after $t_0$ (zero-filled)                                         | mL/mg | log1p; impute; scale                 | Net urine output with irrigation adjustment (MIMIC-IV) |
| uo_2h_ml_zero_filled          | Cumulative urine output in 0–2h after $t_0$ (zero-filled)                      | mL    | log1p; impute; scale                 |                                                        |
| uo_6h_ml_zero_filled          | Cumulative urine output in 0–6h after $t_0$ (zero-filled)                      | mL    | log1p; impute; scale                 |                                                        |
| uo_12h_ml_zero_filled         | Cumulative urine output in 0–12h after $t_0$ (zero-filled)                     | mL    | log1p; impute; scale                 |                                                        |

(continued)

| Feature (column name)         | Definition (brief)                                                                | Unit  | Transform / imputation | Note                                                     |
|-------------------------------|-----------------------------------------------------------------------------------|-------|------------------------|----------------------------------------------------------|
| first_dose_furosemide_eq_mg   | First intravenous loop diuretic dose at $t_0$ (furosemide-equivalent)             | mg    | log1p; impute; scale   | Bumetanide converted by factor 40                        |
| furosemide_eq_total_24h_mg    | Total loop diuretic dose in first 24h after ICU admission (furosemide-equivalent) | mg    | log1p; impute; scale   | eICU additionally includes torsemide (factor 2)          |
| minutes_icu_to_first_diuretic | Time from ICU admission to first eligible diuretic administration                 | min   | log1p; impute; scale   |                                                          |
| map_nearest_mmhg              | Mean arterial pressure (closest value around $t_0$ )                              | mmHg  | impute; scale          | Window defined relative to $t_0$                         |
| cvp_nearest_mmhg              | Central venous pressure (closest value around $t_0$ )                             | mmHg  | impute; scale          | Highly missing; included with missingness indicator      |
| creatinine_baseline_mgdl      | Baseline creatinine (closest value around $t_0$ )                                 | mg/dL | impute; scale          | Used for AKI48h definition (creatinine-only KDIGO proxy) |
| bun_baseline_mgdl             | Baseline blood urea nitrogen (closest value around $t_0$ )                        | mg/dL | log1p; impute; scale   |                                                          |
| sodium_baseline_meql          | Baseline sodium (closest value around $t_0$ )                                     | mEq/L | impute; scale          |                                                          |
| age_at_admit                  | Age at ICU admission                                                              | years | impute; scale          |                                                          |
| cvp_missing                   | Missingness indicator for CVP (0/1)                                               | -     | no log; impute; scale  | Derived from whether cvp_nearest_mmhg is missing         |

## S1.4 Cross-database variable harmonization (MIMIC-IV ↔ eICU-CRD)

Table S3 summarizes the harmonized feature definitions and source mappings used to implement an isomorphic 16-feature pipeline across MIMIC-IV and eICU-CRD.

Table S3: Harmonized variable mapping between MIMIC-IV and eICU-CRD for the 16 core Mapper features.

| Feature                       | MIMIC-IV extraction                                                                                                                                                                                            | eICU-CRD extraction                                                                                                                                                                                                                                                                                        | Harmonization notes                                                                                                         |
|-------------------------------|----------------------------------------------------------------------------------------------------------------------------------------------------------------------------------------------------------------|------------------------------------------------------------------------------------------------------------------------------------------------------------------------------------------------------------------------------------------------------------------------------------------------------------|-----------------------------------------------------------------------------------------------------------------------------|
| dei_2h_zero_filled_ml_per_mg  | DEI = urine output in 0–2h after $t_0$ divided by first-dose furosemide-equivalent (mg). Urine from <code>icu.outputevents</code> (mL; 0–5000) using urine itemids; GU irrigant-in is subtracted when present. | DEI defined analogously using <code>intakeOutput</code> urine entries (cell-label contains <code>urine/foley</code> ; exclude 0); count/occurrence; 0–5000 mL) within 0–2h after $t_0$ . First dose from <code>medication/infusionDrug</code> .                                                            | Zero-filled numerator: <code>COALESCE(uo\_2h\_ml, 0)</code> ; denominator is first-dose loop diuretic.                      |
| dei_6h_zero_filled_ml_per_mg  | Same as above, using 0–6h urine aggregation (0–360 min) after $t_0$ .                                                                                                                                          | Same as above, using 0–6h urine aggregation after $t_0$ .                                                                                                                                                                                                                                                  | Window definitions are isomorphic across cohorts.                                                                           |
| dei_12h_zero_filled_ml_per_mg | Same as above, using 0–12h urine aggregation (0–720 min) after $t_0$ .                                                                                                                                         | Same as above, using 0–12h urine aggregation after $t_0$ .                                                                                                                                                                                                                                                 | Sensitivity analyses evaluate alternative DEI denominators (dose flooring / 24h total dose).                                |
| uo_2h_ml_zero_filled          | Cumulative urine output in 0–2h after $t_0$ from <code>icu.outputevents</code> (mL; 0–5000), with irrigation adjustment via negative contribution of GU irrigant-in itemid.                                    | Cumulative urine output in 0–2h after $t_0$ from <code>intakeOutput</code> numeric urine entries (mL; 0–5000); no explicit irrigant subtraction in eICU.                                                                                                                                                   | Stored as zero-filled output for modeling; raw <code>uo\_2h\_ml</code> remains missing when no events.                      |
| uo_6h_ml_zero_filled          | Same as above for 0–6h after $t_0$ .                                                                                                                                                                           | Same as above for 0–6h after $t_0$ .                                                                                                                                                                                                                                                                       | Urine monitoring density summarized in QC Table S4.                                                                         |
| uo_12h_ml_zero_filled         | Same as above for 0–12h after $t_0$ .                                                                                                                                                                          | Same as above for 0–12h after $t_0$ .                                                                                                                                                                                                                                                                      | Urine counts are captured by <code>urine\_measurements\_12h\_n</code> .                                                     |
| first_dose_furosemide_eq_mg   | First eligible IV loop diuretic dose within 24h after ICU admission from <code>icu.inpotevents</code> , 221794/228340 (furosemide) and 229639 (bumetanide). Furosemide-equivalent: bumetanide $\times 40$ .    | First eligible IV loop diuretic dose within 0–1440 min after ICU admission from <code>medication</code> (IV routes) and <code>infusionDrug</code> . Drugname patterns: <code>furosemide/lasix/bumetanide/bumex/torseamide</code> . Furosemide-equivalent: bumetanide $\times 40$ , torseamide $\times 2$ . | Dose QC: positive mg and $\leq 5000$ when parsed; harmonized to mg furosemide-equivalent.                                   |
| furosemide_eq_total_24h_mg    | Sum of furosemide-equivalent loop diuretic doses in the first 24h after ICU admission from <code>icu.inpotevents</code> .                                                                                      | Sum of furosemide-equivalent loop diuretic doses in the first 24h after ICU admission from <code>medication/infusionDrug</code> .                                                                                                                                                                          | Used as a baseline adjustment covariate and as an alternative DEI denominator in sensitivity analyses.                      |
| minutes_icu_to_first_diuretic | <code>DATE\_DIFF('minute', icustays.intime, first\_diuretic\_time)</code> .                                                                                                                                    | Minutes since ICU admission to first eligible diuretic; operationally equals <code>first\_diuretic\_offset\_min</code> .                                                                                                                                                                                   | Both cohorts enforce $t_0$ within the first 24h after ICU admission.                                                        |
| map_nearest_mmhg              | Nearest mean arterial pressure around $t_0$ from <code>icu.charthevents</code> , itemids 220052/220181; window $t_0$ -6h to $t_0$ +2h; QC range 20–200.                                                        | Nearest mean arterial pressure around $t_0$ from <code>vitalPeriodic.systemicmean</code> and <code>vitalAperiodic.noninvasivemean</code> ; window $t_0$ -360 to $t_0$ +120 min; QC range 20–200.                                                                                                           | Monitoring density stored as <code>map\_measurements\_n</code> ; nearest selection minimizes <code> time - \tzero </code> . |
| cvp_nearest_mmhg              | Nearest central venous pressure around $t_0$ from <code>icu.charthevents</code> , itemid 220074; window $t_0$ -6h to $t_0$ +2h; QC range -5–35.                                                                | Nearest CVP around $t_0$ from <code>vitalPeriodic.cvp</code> ; window $t_0$ -360 to $t_0$ +120 min; QC range -5–35.                                                                                                                                                                                        | CVP is sparse; missingness handled via indicator feature <code>cvp_missing</code> .                                         |
| creatinine_baseline_mgdl      | Nearest creatinine around $t_0$ from <code>hosp.labevents</code> , itemids 50912/52546; window $t_0$ -24h to $t_0$ +6h; QC range 0.1–20.                                                                       | Nearest creatinine around $t_0$ from <code>lab</code> where <code>labname='creatinine'</code> ; window $t_0$ -1440 to $t_0$ +360 min; QC range 0.1–20.                                                                                                                                                     | Baseline creatinine is used for AKI48h definition (creatinine-only KDIGO proxy).                                            |

(continued)

| Feature                           | MIMIC-IV extraction                                                                                                                                                           | eICU-CRD extraction                                                                                                                                                                | Harmonization notes                                                                            |
|-----------------------------------|-------------------------------------------------------------------------------------------------------------------------------------------------------------------------------|------------------------------------------------------------------------------------------------------------------------------------------------------------------------------------|------------------------------------------------------------------------------------------------|
| <code>bun_baseline_mgdl</code>    | Nearest BUN around $t_0$ from <code>hosp.labevents</code> ,<br>51006/52647; window $t_0-24h$ to $t_0+6h$ ; QC range 1-300.                                                    | Nearest BUN around $t_0$ from <code>lab</code> items where <code>labname='bun'</code> or contains <code>urea nitrogen</code> ; window $t_0-1440$ to $t_0+360$ min; QC range 1-300. | Both cohorts use the closest value to $t_0$ within the prespecified window.                    |
| <code>sodium_baseline_meql</code> | Nearest sodium around $t_0$ from <code>hosp.labevents</code> ,<br>50983/52623; window $t_0-24h$ to $t_0+6h$ ; QC range 90-200.                                                | Nearest sodium around $t_0$ from <code>lab</code> items where <code>labname='sodium'</code> ; window $t_0-1440$ to $t_0+360$ min; QC range 90-200.                                 | Units are harmonized as mEq/L by source conventions; extreme values are filtered by QC rules.  |
| <code>age_at_admit</code>         | Age at ICU admission derived from <code>patients.anchor\_age</code> , <code>patient.age</code> , <code>patients.anchor\_year</code> , and <code>admissions.admittime</code> . | Age at ICU admission from <code>patients.anchor\_age</code> ; <code>&gt;89</code> is treated as 90.                                                                                | Restricted to adults ( $\geq 18$ years).                                                       |
| <code>cvp_missing</code>          | Derived as indicator of missing <code>cvp_nearest_mmhg</code> (computed down-stream for modeling).                                                                            | Computed during extraction as 1 if <code>cvp_nearest_mmhg</code> is NULL, else 0.                                                                                                  | Used to stabilize inclusion of sparse monitoring (CVP) in clustering and sensitivity analyses. |

## S1.5 Missingness and monitoring density (quality control)

Table S4 summarizes missingness of the domain-specific baseline values and the measurement density of key monitoring streams (urine output, MAP, CVP, and baseline laboratories) for both cohorts.

Table S4: Missingness and measurement-density quality-control summary for monitored domains used in Mapper features.

| Domain                                           | MIMIC-IV    |                    |             | median | eICU-CRD    |                    |             |
|--------------------------------------------------|-------------|--------------------|-------------|--------|-------------|--------------------|-------------|
|                                                  | Missing (%) | No measurement (%) | Count [IQR] |        | Missing (%) | No measurement (%) | Count [IQR] |
| Urine output monitoring (0–12h after $t_0$ )     | 1.0         | 1.0                | 9 [7, 11]   |        | 37.4        | 37.4               | 4 [2, 7]    |
| MAP monitoring ( $t_0$ -6h to $t_0$ +2h)         | 0.6         | 0.6                | 8 [5, 9]    |        | 3.2         | 3.2                | 12 [8, 22]  |
| CVP monitoring ( $t_0$ -6h to $t_0$ +2h)         | 80.7        | 80.7               | 8 [4, 9]    |        | 91.4        | 91.4               | 50 [22, 92] |
| Creatinine monitoring ( $t_0$ -24h to $t_0$ +6h) | 5.5         | 5.5                | 2 [1, 2]    |        | 7.4         | 7.4                | 6 [3, 8]    |
| BUN monitoring ( $t_0$ -24h to $t_0$ +6h)        | 5.6         | 5.6                | 2 [1, 2]    |        | 7.6         | 7.6                | 6 [3, 8]    |
| Sodium monitoring ( $t_0$ -24h to $t_0$ +6h)     | 4.8         | 4.8                | 2 [1, 3]    |        | 7.1         | 7.1                | 6 [3, 8]    |

## S1.6 Mapper modeling and stability assessment

Mapper networks were built using Giotto-TDA, with a two-stage parameter search (coarse grid followed by local refinement) and bootstrap co-membership stability assessment (200 iterations; 80% subsampling without replacement). Table S5 summarizes the optimal parameters and graph statistics for the main cohort.

Table S5: Optimal Mapper parameters and graph statistics for the main cohort (MIMIC-IV).

| Metric                            | Value             |
|-----------------------------------|-------------------|
| Lens                              | pca2d             |
| n_intervals                       | 8                 |
| overlap_frac                      | 0.55              |
| DBSCAN $\epsilon$ (eps)           | 0.7               |
| DBSCAN min_samples                | 8                 |
| Nodes / edges                     | 58 / 393          |
| Coverage                          | 1.000             |
| Largest component fraction        | 1.000             |
| Connected components              | 1                 |
| Modularity                        | 0.399             |
| Bootstrap Jaccard (mean $\pm$ SD) | 0.924 $\pm$ 0.038 |
| Stability score                   | 0.944             |
| Final score                       | 0.859             |

## S1.7 Outcomes, dynamic patterns, and sensitivity analyses

The primary outcome was in-hospital mortality. The mechanistic endpoint was AKI within 48 hours after  $t_0$  using creatinine-only KDIGO criteria (AKI48h proxy). Dynamic response patterns were defined using segmented DEI trajectories (0–2h, 2–6h, 6–12h). Sensitivity analyses targeted (i) potential denominator artifacts in DEI caused by extremely small first doses and (ii) potential structural bias induced by highly missing monitoring variables (e.g., CVP), as well as observed vs. zero-filled response representations.

## S2 Supplementary Results: Main Cohort (MIMIC-IV)

### S2.1 Mapper network and branch annotation

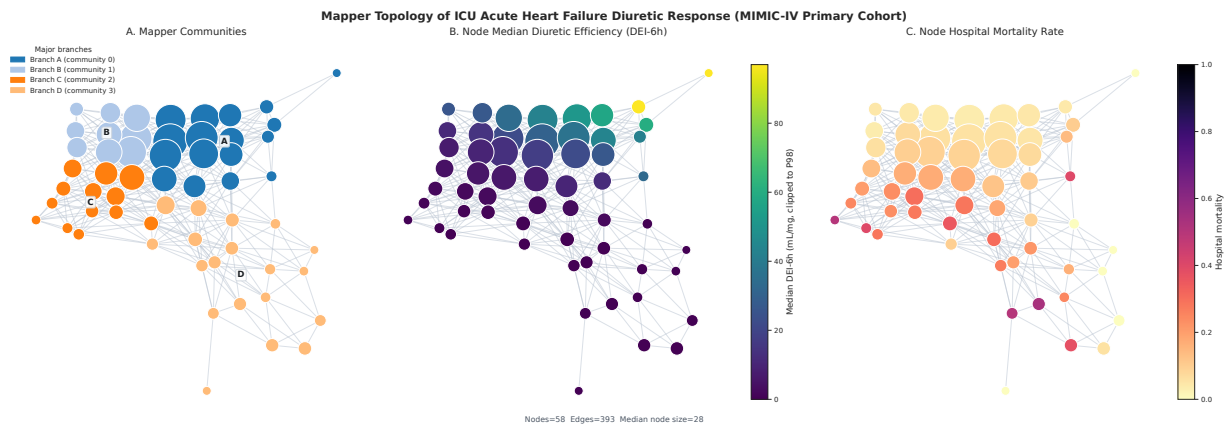

Fig. S1: Mapper network for the main cohort (MIMIC-IV) with major branch annotations.

### S2.2 Clinical profile (Stage 1 Table 1)

For readability, Stage 1 Table 1 is presented in two parts: a clinical profile table (Table S6) and a pairwise standardized mean difference summary (Table S7).

Table S6: Main cohort (MIMIC-IV): Stage 1 Table 1a (clinical profile; field-level display).

| Variable                                 | Level              | Overall        | A              | B               | C             | D             | P Test                                                | q(FDR-BH) |
|------------------------------------------|--------------------|----------------|----------------|-----------------|---------------|---------------|-------------------------------------------------------|-----------|
| n                                        |                    | 2373           | 1747           | 461             | 105           | 60            |                                                       |           |
| age_at_admit, mean (SD)                  |                    | 73.2 (13.5)    | 74.1 (13.5)    | 70.3 (13.2)     | 72.5 (13.5)   | 73.4 (13.6)   | < 0.001 One-way ANOVA                                 |           |
| first_dose_furosemide_eq_mg, mean (SD)   |                    | 46.1 (42.4)    | 31.2 (19.5)    | 90.2 (56.6)     | 97.3 (67.3)   | 52.6 (39.3)   | < 0.001 One-way ANOVA                                 |           |
| furosemide_eq_total_24h_mg, mean (SD)    |                    | 130.1 (163.0)  | 75.7 (90.7)    | 288.1 (204.2)   | 353.2 (252.6) | 110.4 (124.8) | < 0.001 One-way ANOVA                                 |           |
| minutes_icu_to_first_diuretic, mean (SD) |                    | 474.6 (416.1)  | 542.5 (430.2)  | 254.7 (271.4)   | 282.8 (297.0) | 521.3 (415.5) | < 0.001 One-way ANOVA                                 |           |
| map_nearest_mmhg, mean (SD)              |                    | 77.6 (15.5)    | 77.6 (15.2)    | 79.1 (16.0)     | 72.6 (15.9)   | 75.8 (18.4)   | 0.001 One-way ANOVA                                   | 0.005     |
| cvp_nearest_mmhg, mean (SD)              |                    | 14.1 (6.0)     | 13.0 (5.4)     | 17.6 (6.6)      | 18.9 (5.6)    | 21.9 (5.7)    | < 0.001 One-way ANOVA                                 |           |
| creatinine_baseline_mgdl, mean (SD)      |                    | 1.6 (0.9)      | 1.3 (0.6)      | 2.2 (1.0)       | 3.3 (1.5)     | 2.0 (1.2)     | < 0.001 One-way ANOVA                                 |           |
| bun_baseline_mgdl, mean (SD)             |                    | 36.8 (23.3)    | 29.5 (16.5)    | 56.1 (26.9)     | 69.6 (26.2)   | 42.4 (19.7)   | < 0.001 One-way ANOVA                                 |           |
| sodium_baseline_meql, mean (SD)          |                    | 137.8 (5.2)    | 138.1 (4.9)    | 137.2 (5.5)     | 135.6 (6.0)   | 137.5 (6.3)   | < 0.001 One-way ANOVA                                 |           |
| uo_2h_ml_zero_filled, mean (SD)          |                    | 390.6 (352.1)  | 406.3 (346.6)  | 460.3 (360.7)   | 43.5 (47.5)   | 3.1 (9.3)     | < 0.001 One-way ANOVA                                 |           |
| uo_6h_ml_zero_filled, mean (SD)          |                    | 881.6 (643.1)  | 882.1 (570.2)  | 1147.4 (786.6)  | 204.0 (151.7) | 10.7 (25.0)   | < 0.001 One-way ANOVA                                 |           |
| uo_12h_ml_zero_filled, mean (SD)         |                    | 1422.5 (925.1) | 1377.2 (784.5) | 1972.2 (1143.2) | 490.2 (399.2) | 148.7 (317.2) | < 0.001 One-way ANOVA                                 |           |
| dei_2h_zero_filled_ml_per_mg, mean (SD)  |                    | 17.9 (92.8)    | 22.5 (107.7)   | 6.7 (6.7)       | 0.6 (0.7)     | 0.1 (0.3)     | < 0.001 One-way ANOVA                                 |           |
| dei_6h_zero_filled_ml_per_mg, mean (SD)  |                    | 50.9 (579.8)   | 64.4 (675.2)   | 17.2 (18.2)     | 2.7 (2.3)     | 0.4 (0.9)     | 0.297 One-way ANOVA                                   | 0.430     |
| dei_12h_zero_filled_ml_per_mg, mean (SD) |                    | 87.8 (1068.3)  | 110.6 (1244.2) | 30.2 (31.4)     | 6.4 (5.2)     | 9.7 (46.5)    | 0.382 One-way ANOVA                                   | 0.430     |
| gender, n (%)                            | F                  | 1161 (48.9)    | 912 (52.2)     | 166 (36.0)      | 47 (44.8)     | 36 (60.0)     | < 0.001 Chi-squared                                   |           |
|                                          | M                  | 1212 (51.1)    | 835 (47.8)     | 295 (64.0)      | 58 (55.2)     | 24 (40.0)     |                                                       |           |
| insurance, n (%)                         | Medicaid           | 198 (8.3)      | 139 (8.0)      | 42 (9.1)        | 10 (9.5)      | 7 (11.7)      | 0.430 Chi-squared<br>(warning:<br>expected count < 5) | 0.430     |
|                                          | Medicare           | 1782 (75.1)    | 1330 (76.1)    | 328 (71.1)      | 79 (75.2)     | 45 (75.0)     |                                                       |           |
|                                          | None               | 19 (0.8)       | 15 (0.9)       | 3 (0.7)         | 0 (0.0)       | 1 (1.7)       |                                                       |           |
|                                          | Other              | 40 (1.7)       | 32 (1.8)       | 7 (1.5)         | 0 (0.0)       | 1 (1.7)       |                                                       |           |
|                                          | Private            | 334 (14.1)     | 231 (13.2)     | 81 (17.6)       | 16 (15.2)     | 6 (10.0)      |                                                       |           |
| admission_type, n (%)                    | DIRECT EMER.       | 118 (5.0)      | 76 (4.4)       | 33 (7.2)        | 7 (6.7)       | 2 (3.3)       | 0.034 Chi-squared<br>(warning:<br>expected count < 5) | 0.085     |
|                                          | DIRECT OBSERVATION | 1 (0.0)        | 0 (0.0)        | 1 (0.2)         | 0 (0.0)       | 0 (0.0)       |                                                       |           |
|                                          | ELECTIVE           | 63 (2.7)       | 58 (3.3)       | 4 (0.9)         | 1 (1.0)       | 0 (0.0)       |                                                       |           |
|                                          | EU OBSERVATION     | 2 (0.1)        | 2 (0.1)        | 0 (0.0)         | 0 (0.0)       | 0 (0.0)       |                                                       |           |
|                                          | EW EMER.           | 1554 (65.5)    | 1147 (65.7)    | 299 (64.9)      | 68 (64.8)     | 40 (66.7)     |                                                       |           |
|                                          | OBSERVATION ADMIT  | 3 (0.1)        | 1 (0.1)        | 2 (0.4)         | 0 (0.0)       | 0 (0.0)       |                                                       |           |

(continued)

| Variable              | Level                                               | Overall     | A          | B          | C         | D         | P Test                                                     | q(FDR-BH) |
|-----------------------|-----------------------------------------------------|-------------|------------|------------|-----------|-----------|------------------------------------------------------------|-----------|
| first_careunit, n (%) | SURGICAL SAME DAY<br>ADMISSION                      | 55 (2.3)    | 48 (2.7)   | 6 (1.3)    | 1 (1.0)   | 0 (0.0)   | < 0.001 Chi-squared<br>(warning:<br>expected count <<br>5) |           |
|                       | URGENT                                              | 577 (24.3)  | 415 (23.8) | 116 (25.2) | 28 (26.7) | 18 (30.0) |                                                            |           |
|                       | Cardiac Vascular Intensive<br>Care Unit (CVICU)     | 358 (15.1)  | 319 (18.3) | 26 (5.6)   | 8 (7.6)   | 5 (8.3)   |                                                            |           |
|                       | Coronary Care Unit (CCU)                            | 1098 (46.3) | 696 (39.8) | 315 (68.3) | 64 (61.0) | 23 (38.3) |                                                            |           |
|                       | Medical Intensive Care Unit<br>(MICU)               | 517 (21.8)  | 397 (22.7) | 75 (16.3)  | 22 (21.0) | 23 (38.3) |                                                            |           |
|                       | Medical/Surgical Intensive<br>Care Unit (MICU/SICU) | 260 (11.0)  | 216 (12.4) | 31 (6.7)   | 7 (6.7)   | 6 (10.0)  |                                                            |           |
|                       | Surgical Intensive Care Unit<br>(SICU)              | 94 (4.0)    | 79 (4.5)   | 9 (2.0)    | 3 (2.9)   | 3 (5.0)   |                                                            |           |
|                       | Trauma SICU (TSICU)                                 | 46 (1.9)    | 40 (2.3)   | 5 (1.1)    | 1 (1.0)   | 0 (0.0)   |                                                            |           |

Table S7: Main cohort (MIMIC-IV): Stage 1 Table 1b (pairwise standardized mean differences).

| Variable                                 | Level                                        | SMD(A,B) | SMD(A,C) | SMD(A,D) | SMD(B,C) | SMD(B,D) | SMD(C,D) | P       | q(FDR-BH) |
|------------------------------------------|----------------------------------------------|----------|----------|----------|----------|----------|----------|---------|-----------|
| n                                        |                                              |          |          |          |          |          |          |         |           |
| age_at_admit, mean (SD)                  |                                              | -0.284   | -0.115   | -0.049   | 0.168    | 0.233    | 0.065    | < 0.001 |           |
| first_dose_furosemide_eq_mg, mean (SD)   |                                              | 1.392    | 1.334    | 0.689    | 0.114    | -0.772   | -0.812   | < 0.001 |           |
| furosemide_eq_total_24h_mg, mean (SD)    |                                              | 1.344    | 1.462    | 0.318    | 0.283    | -1.050   | -1.218   | < 0.001 |           |
| minutes_icu_to_first_diuretic, mean (SD) |                                              | -0.800   | -0.703   | -0.050   | 0.099    | 0.760    | 0.660    | < 0.001 |           |
| map_nearest_mmhg, mean (SD)              |                                              | 0.096    | -0.320   | -0.103   | -0.406   | -0.188   | 0.189    | 0.001   | 0.005     |
| cvp_nearest_mmhg, mean (SD)              |                                              | 0.765    | 1.077    | 1.593    | 0.218    | 0.692    | 0.515    | < 0.001 |           |
| creatinine_baseline_mgdl, mean (SD)      |                                              | 1.202    | 1.802    | 0.816    | 0.850    | -0.179   | -0.936   | < 0.001 |           |
| bun_baseline_mgdl, mean (SD)             |                                              | 1.190    | 1.830    | 0.707    | 0.510    | -0.582   | -1.175   | < 0.001 |           |
| sodium_baseline_meql, mean (SD)          |                                              | -0.160   | -0.457   | -0.107   | -0.290   | 0.039    | 0.309    | < 0.001 |           |
| uo_2h_ml_zero_filled, mean (SD)          |                                              | 0.153    | -1.467   | -1.645   | -1.621   | -1.792   | -1.179   | < 0.001 |           |
| uo_6h_ml_zero_filled, mean (SD)          |                                              | 0.386    | -1.625   | -2.159   | -1.665   | -2.043   | -1.777   | < 0.001 |           |
| uo_12h_ml_zero_filled, mean (SD)         |                                              | 0.607    | -1.425   | -2.053   | -1.731   | -2.174   | -0.947   | < 0.001 |           |
| dei_2h_zero_filled_ml_per_mg, mean (SD)  |                                              | -0.206   | -0.287   | -0.294   | -1.281   | -1.396   | -0.889   | < 0.001 |           |
| dei_6h_zero_filled_ml_per_mg, mean (SD)  |                                              | -0.099   | -0.129   | -0.134   | -1.115   | -1.304   | -1.327   | 0.297   | 0.430     |
| dei_12h_zero_filled_ml_per_mg, mean (SD) |                                              | -0.091   | -0.118   | -0.115   | -1.059   | -0.517   | 0.101    | 0.382   | 0.430     |
| gender, n (%)                            | F                                            | 0.331    | 0.149    | 0.158    | 0.179    | 0.495    | 0.309    | < 0.001 |           |
|                                          | M                                            |          |          |          |          |          |          |         |           |
| insurance, n (%)                         | Medicaid                                     | 0.136    | 0.246    | 0.169    | 0.223    | 0.245    | 0.308    | 0.430   | 0.430     |
|                                          | Medicare                                     |          |          |          |          |          |          |         |           |
|                                          | None                                         |          |          |          |          |          |          |         |           |
|                                          | Other                                        |          |          |          |          |          |          |         |           |
|                                          | Private                                      |          |          |          |          |          |          |         |           |
| admission_type, n (%)                    | DIRECT EMER.                                 | 0.259    | -        | -        | -        | -        | -        | 0.034   | 0.085     |
|                                          | DIRECT OBSERVATION                           |          |          |          |          |          |          |         |           |
|                                          | ELECTIVE                                     |          |          |          |          |          |          |         |           |
|                                          | EU OBSERVATION                               |          |          |          |          |          |          |         |           |
|                                          | EW EMER.                                     |          |          |          |          |          |          |         |           |
|                                          | OBSERVATION ADMIT                            |          |          |          |          |          |          |         |           |
|                                          | SURGICAL SAME DAY                            |          |          |          |          |          |          |         |           |
|                                          | ADMISSION                                    |          |          |          |          |          |          |         |           |
|                                          | URGENT                                       |          |          |          |          |          |          |         |           |
| first_careunit, n (%)                    | Cardiac Vascular Intensive Care Unit (CVICU) | 0.636    | 0.494    | 0.466    | 0.173    | 0.684    | 0.516    | < 0.001 |           |
|                                          | Coronary Care Unit (CCU)                     |          |          |          |          |          |          |         |           |

(continued)

| Variable | Level                                            | SMD(A,B) | SMD(A,C) | SMD(A,D) | SMD(B,C) | SMD(B,D) | SMD(C,D) | P <sub>q</sub> (FDR-BH) |
|----------|--------------------------------------------------|----------|----------|----------|----------|----------|----------|-------------------------|
|          | Medical Intensive Care Unit (MICU)               |          |          |          |          |          |          |                         |
|          | Medical/Surgical Intensive Care Unit (MICU/SICU) |          |          |          |          |          |          |                         |
|          | Surgical Intensive Care Unit (SICU)              |          |          |          |          |          |          |                         |
|          | Trauma SICU (TSICU)                              |          |          |          |          |          |          |                         |

### S2.3 In-hospital mortality

Kaplan–Meier summaries are provided in Table S8. Survival curves and multivariable Cox model branch effects are shown in Fig. S2 and Fig. S3.

Table S8: Kaplan–Meier summary by branch (MIMIC-IV).

| branch_label | n    | events | median_survival_days | 30d_survival | 60d_survival |
|--------------|------|--------|----------------------|--------------|--------------|
| A            | 1747 | 123    | 127.378              | 0.748        | 0.562        |
| B            | 461  | 41     | inf                  | 0.776        | 0.679        |
| C            | 105  | 31     | inf                  | 0.575        | 0.575        |
| D            | 60   | 17     | inf                  | 0.690        | 0.690        |

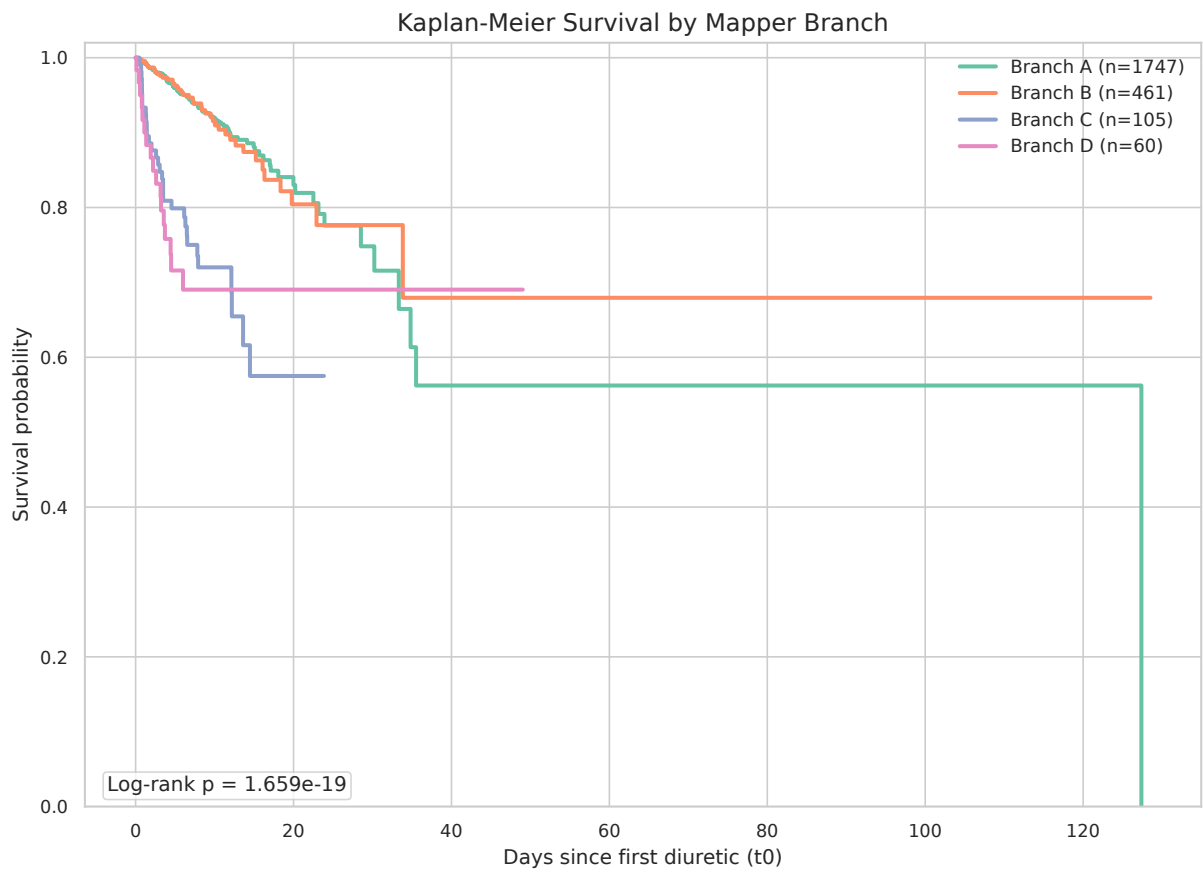

Fig. S2: Kaplan–Meier survival curves by major branch in the main cohort (MIMIC-IV).

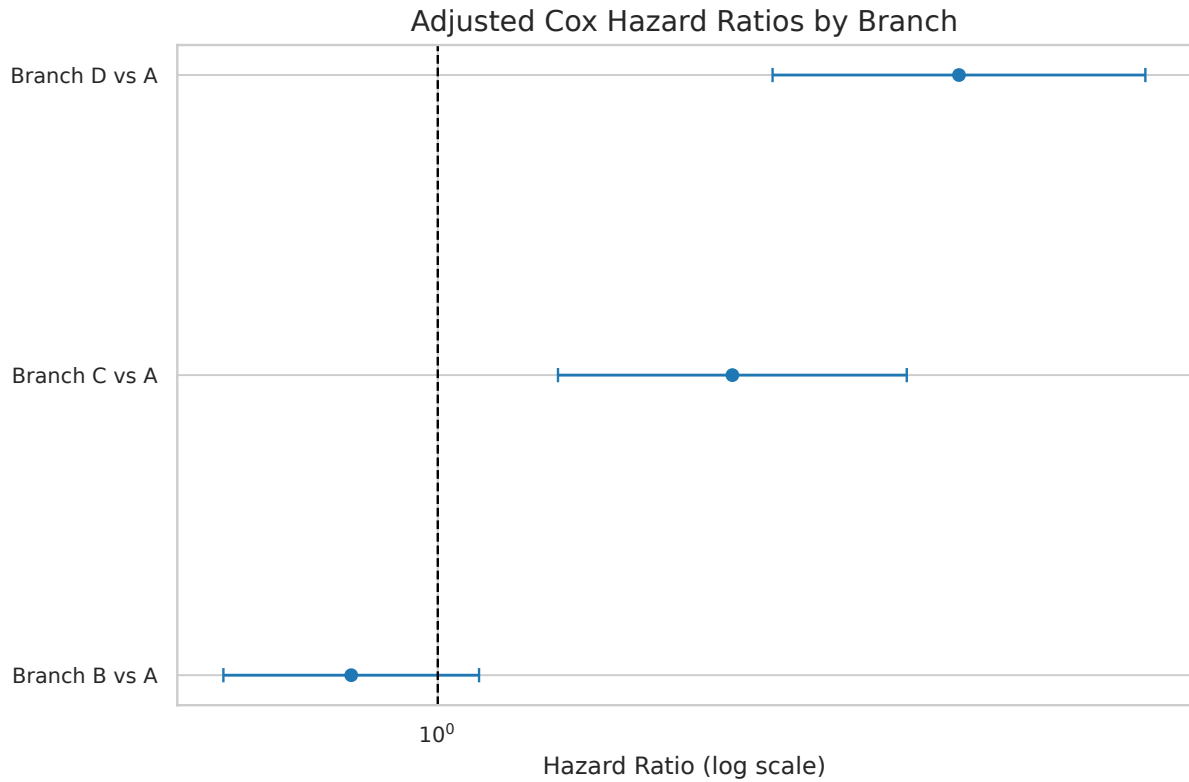

Fig. S3: Forest plot for branch effects in the multivariable Cox model (MIMIC-IV).

## S2.4 AKI within 48 hours (AKI48h; KDIGO creatinine proxy)

Branch-level AKI48h rates are provided in Table S9. Full adjusted odds ratios are provided in Table S24.

Table S9: AKI48h (creatinine-only KDIGO proxy) by branch (MIMIC-IV).

| branch_label | n    | followup_n | aki48_n | aki48_rate | stage2plus_n | stage2plus_rate |
|--------------|------|------------|---------|------------|--------------|-----------------|
| A            | 1747 | 1739       | 391     | 0.224      | 27           | 0.015           |
| B            | 461  | 461        | 98      | 0.213      | 3            | 0.007           |
| C            | 105  | 105        | 48      | 0.457      | 1            | 0.010           |
| D            | 60   | 58         | 19      | 0.317      | 1            | 0.017           |

## S2.5 Dynamic response phenotypes

Dynamic response pattern rates and median segmented DEI increments are provided in Table S10. Cumulative urine output and DEI trajectories are shown in Fig. S4.

Table S10: Dynamic response pattern rates by branch (MIMIC-IV).

| branch_label | n    | primary_nonresponse_rate | tachyphylaxis_rate | dei_0_2_median | dei_2_6_median | dei_6_12_median |
|--------------|------|--------------------------|--------------------|----------------|----------------|-----------------|
| A            | 1747 | 0.232                    | 0.079              | 12.500         | 14.500         | 14.400          |
| B            | 461  | 0.534                    | 0.017              | 4.600          | 6.900          | 8.500           |
| C            | 105  | 1.000                    | 0.000              | 0.375          | 1.375          | 2.625           |
| D            | 60   | 1.000                    | 0.000              | 0.000          | 0.000          | 0.000           |

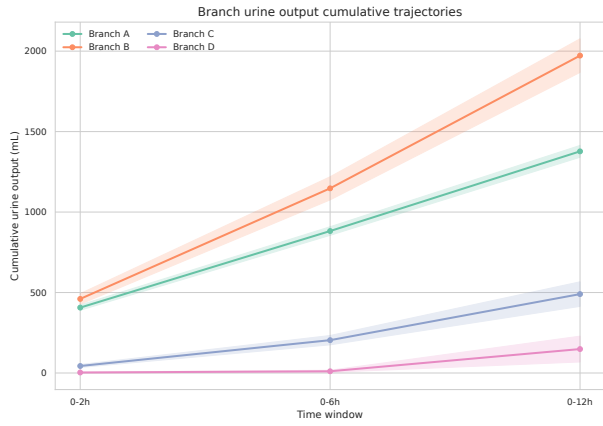

(a) Cumulative urine output

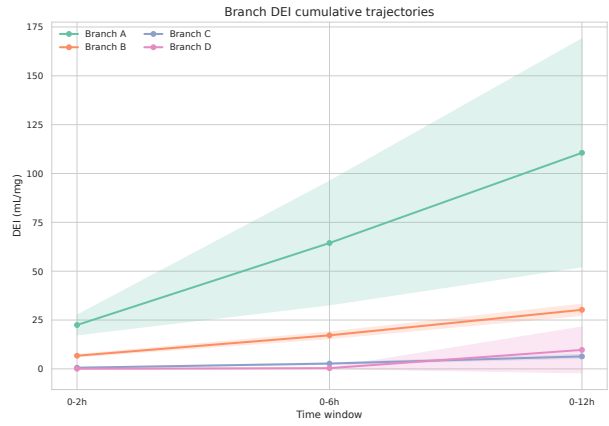

(b) Cumulative DEI

Fig. S4: Dynamic response trajectories by major branch in the main cohort (MIMIC-IV).

## S2.6 Robustness and sensitivity analyses

Table S11 summarizes prespecified sensitivity scenarios that stabilize DEI denominators and vary CVP inclusion. Fig. S5 visualizes the comparison between observed-mode and zero-filled response representations.

Table S11: Sensitivity scenarios for DEI denominator stabilization and CVP strategy (MIMIC-IV).

| Scenario                                     | $n$  | CVP | DEI denominator            | P99    | Max      | Robustness |
|----------------------------------------------|------|-----|----------------------------|--------|----------|------------|
| S0 (raw first-dose DEI + CVP)                | 2373 | Yes | raw (first dose)           | 258.99 | 27600.00 | 0.854      |
| S1 (dose floor 10 mg + no CVP)               | 2373 | No  | first dose $\geq 10$ mg    | 149.42 | 307.50   | 0.858      |
| S2 (floor 10 mg + exclude $< 5$ mg + no CVP) | 2325 | No  | floor + exclude $< 5$ mg   | 145.38 | 307.50   | 0.899      |
| S3 (floor 10 mg + 24h total dose + no CVP)   | 2373 | No  | 24h total dose denominator | 110.64 | 221.00   | 0.902      |
| S4 (floor 10 mg + CVP retained)              | 2373 | Yes | first dose $\geq 10$ mg    | 149.42 | 307.50   | 0.857      |

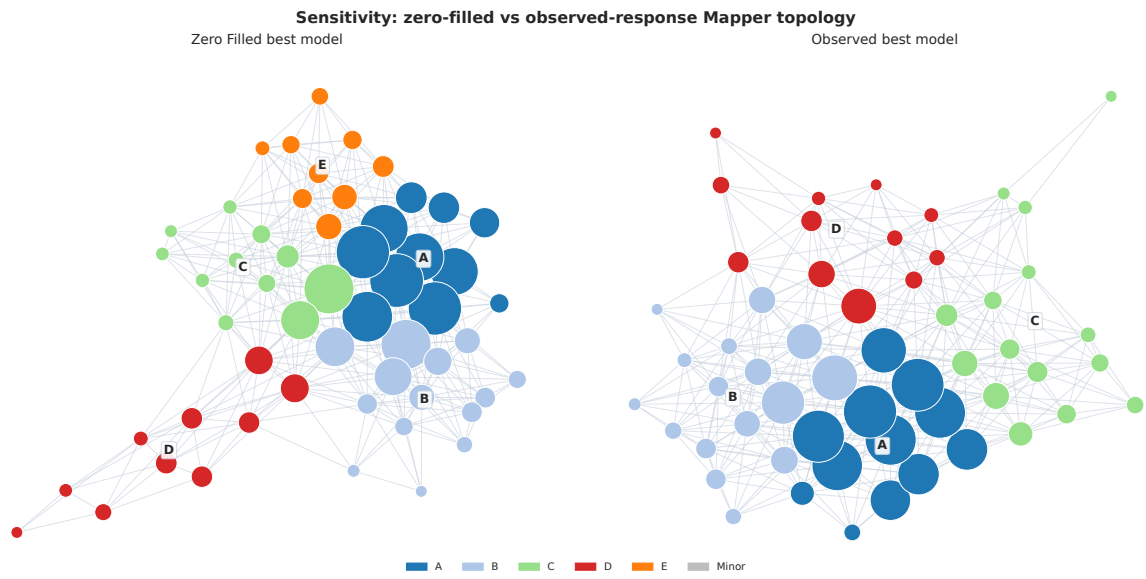

Fig. S5: Observed-mode vs. zero-filled-mode sensitivity comparison (MIMIC-IV).

## S3 Supplementary Results: External Validation (eICU-CRD)

### S3.1 Cohort construction counts

External validation uses ICU stays (`patientunitstayid`) as the analysis unit. The final cohort size after inclusion/exclusion criteria is  $n = 4438$  ICU stays. Among these,  $n = 16$  stays were assigned to a Minor branch and are excluded from major-branch summaries (A–C), yielding a major-branch analysis set of  $n = 4422$ .

Table S12: External validation cohort construction counts (eICU-CRD v2.0).

| Step                             | $n$     |
|----------------------------------|---------|
| All ICU stays                    | 200,859 |
| Adult ICU stays                  | 200,234 |
| Heart failure stays (broad)      | 17,128  |
| Acute HF text-only subset        | 892     |
| HF + IV loop diuretic within 24h | 5,121   |
| After excluding ESRD/dialysis    | 5,056   |
| After excluding sepsis (final)   | 4,438   |

### S3.2 Mapper network and branch annotation

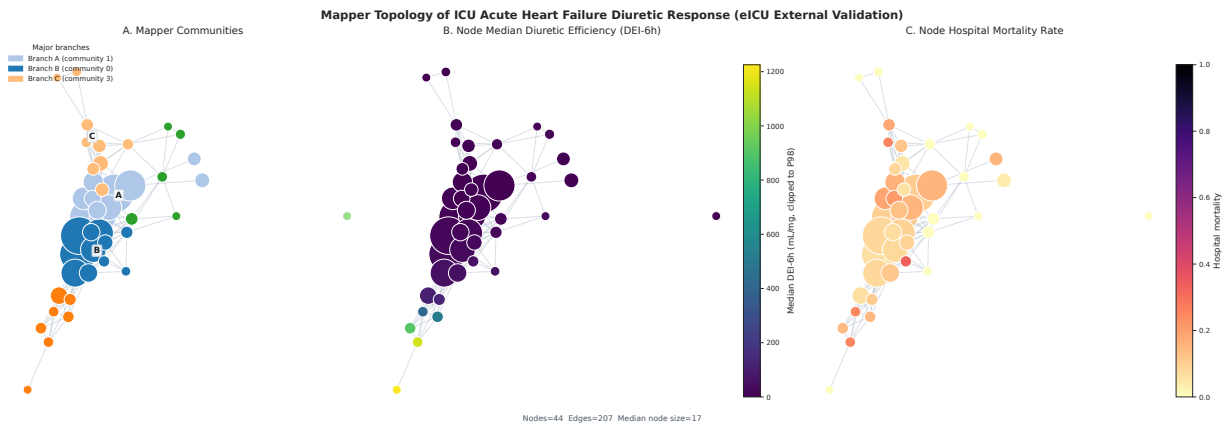

Fig. S6: Mapper network for the external validation cohort (eICU-CRD) with major branch annotations.

### S3.3 Clinical profile (Stage 1 Table 1)

Stage 1 Table 1 summarizes the major branches (A–C) only ( $n = 4422$ ), excluding the Minor branch ( $n = 16$ ) from the full external validation cohort ( $n = 4438$ ). For readability, Stage 1 Table 1 is presented in two parts: a clinical profile table (Table S13) and a pairwise standardized mean difference summary (Table S14).

Table S13: External validation (eICU-CRD): Stage 1 Table 1a (clinical profile; field-level display).

| Variable                                 | Level            | Overall           | A                 | B                 | C                 | P Test                                            | q(FDR-BH) |
|------------------------------------------|------------------|-------------------|-------------------|-------------------|-------------------|---------------------------------------------------|-----------|
| n                                        |                  | 4422              | 2395              | 2006              | 21                |                                                   |           |
| age_at_admit, mean (SD)                  |                  | 70.7 (14.0)       | 71.2 (13.6)       | 70.1 (14.3)       | 60.5 (16.2)       | < 0.001 One-way ANOVA                             |           |
| first_dose_furosemide_eq_mg, mean (SD)   |                  | 45.3 (34.5)       | 49.1 (41.9)       | 40.3 (20.8)       | 78.9 (43.1)       | < 0.001 One-way ANOVA                             |           |
| furosemide_eq_total_24h_mg, mean (SD)    |                  | 68.4 (76.2)       | 74.8 (88.7)       | 60.4 (56.4)       | 93.6 (46.9)       | < 0.001 One-way ANOVA                             |           |
| minutes_icu_to_first_diuretic, mean (SD) |                  | 410.6 (390.9)     | 423.7 (399.6)     | 395.1 (379.7)     | 392.6 (394.2)     | 0.052 One-way ANOVA                               | 0.121     |
| map_nearest_mmhg, mean (SD)              |                  | 85.1 (19.0)       | 84.3 (18.9)       | 86.0 (18.9)       | 93.2 (20.9)       | 0.002 One-way ANOVA                               | 0.014     |
| cvp_nearest_mmhg, mean (SD)              |                  | 13.6 (7.5)        | 13.6 (7.5)        | 13.5 (7.5)        | 4.0 (2.8)         | 0.197 One-way ANOVA                               | 0.345     |
| creatinine_baseline_mgdl, mean (SD)      |                  | 1.6 (1.1)         | 1.7 (1.0)         | 1.4 (0.8)         | 8.9 (1.3)         | < 0.001 One-way ANOVA                             |           |
| bun_baseline_mgdl, mean (SD)             |                  | 33.4 (21.4)       | 35.1 (22.6)       | 30.9 (19.0)       | 79.7 (26.0)       | < 0.001 One-way ANOVA                             |           |
| sodium_baseline_meql, mean (SD)          |                  | 137.7 (5.1)       | 137.5 (5.1)       | 137.9 (5.1)       | 136.8 (7.0)       | 0.035 One-way ANOVA                               | 0.121     |
| uo_2h_ml_zero_filled, mean (SD)          |                  | 184.9 (347.9)     | 15.7 (62.8)       | 388.5 (431.5)     | 27.9 (80.6)       | < 0.001 One-way ANOVA                             |           |
| uo_6h_ml_zero_filled, mean (SD)          |                  | 520.5 (713.1)     | 43.2 (123.1)      | 1095.2 (705.7)    | 46.7 (115.2)      | < 0.001 One-way ANOVA                             |           |
| uo_12h_ml_zero_filled, mean (SD)         |                  | 892.4 (1065.8)    | 265.2 (610.1)     | 1648.6 (1005.6)   | 174.5 (384.4)     | < 0.001 One-way ANOVA                             |           |
| dei_2h_zero_filled_ml_per_mg, mean (SD)  |                  | 5.1 (10.4)        | 0.3 (1.0)         | 11.1 (13.3)       | 0.4 (1.2)         | < 0.001 One-way ANOVA                             |           |
| dei_6h_zero_filled_ml_per_mg, mean (SD)  |                  | 14.1 (20.8)       | 0.8 (1.9)         | 30.6 (21.7)       | 0.7 (1.5)         | < 0.001 One-way ANOVA                             |           |
| dei_12h_zero_filled_ml_per_mg, mean (SD) |                  | 24.9 (57.6)       | 8.4 (68.2)        | 45.4 (30.8)       | 2.0 (4.1)         | < 0.001 One-way ANOVA                             |           |
| icu_los_minutes, mean (SD)               |                  | 4969.8 (5681.9)   | 4945.3 (5616.5)   | 5000.7 (5784.8)   | 4806.1 (2337.3)   | 0.941 One-way ANOVA                               | 0.941     |
| hosp_los_minutes, mean (SD)              |                  | 11505.6 (15614.2) | 11736.1 (18306.1) | 11226.1 (11671.7) | 11924.2 (10386.6) | 0.555 One-way ANOVA                               | 0.648     |
| gender, n (%)                            | Female           | 2107 (47.6)       | 1226 (51.2)       | 874 (43.6)        | 7 (33.3)          | < 0.001 Chi-squared                               |           |
|                                          | Male             | 2315 (52.4)       | 1169 (48.8)       | 1132 (56.4)       | 14 (66.7)         |                                                   |           |
| race, n (%)                              | African American | 626 (14.2)        | 353 (14.7)        | 265 (13.2)        | 8 (38.1)          | < 0.001 Chi-squared (warning: expected count < 5) |           |
|                                          | Asian            | 56 (1.3)          | 35 (1.5)          | 20 (1.0)          | 1 (4.8)           |                                                   |           |
|                                          | Caucasian        | 3226 (73.0)       | 1749 (73.0)       | 1467 (73.1)       | 10 (47.6)         |                                                   |           |
|                                          | Hispanic         | 265 (6.0)         | 93 (3.9)          | 172 (8.6)         | 0 (0.0)           |                                                   |           |
|                                          | Native American  | 17 (0.4)          | 10 (0.4)          | 7 (0.3)           | 0 (0.0)           |                                                   |           |
|                                          | None             | 17 (0.4)          | 10 (0.4)          | 7 (0.3)           | 0 (0.0)           |                                                   |           |
|                                          | Other/Unknown    | 215 (4.9)         | 145 (6.1)         | 68 (3.4)          | 2 (9.5)           |                                                   |           |
| first_careunit, n (%)                    | CCU-CTICU        | 531 (12.0)        | 243 (10.1)        | 286 (14.3)        | 2 (9.5)           | < 0.001 Chi-squared (warning: expected count < 5) |           |
|                                          | CSICU            | 164 (3.7)         | 101 (4.2)         | 62 (3.1)          | 1 (4.8)           |                                                   |           |

(continued)

| Variable                  | Level                | Overall     | A           | B           | C         | P Test                                                     | q(FDR-BH) |
|---------------------------|----------------------|-------------|-------------|-------------|-----------|------------------------------------------------------------|-----------|
| admission_location, n (%) | CTICU                | 119 (2.7)   | 75 (3.1)    | 44 (2.2)    | 0 (0.0)   | 0.418 Chi-squared<br>(warning:<br>expected count <<br>5)   | 0.585     |
|                           | Cardiac ICU          | 620 (14.0)  | 333 (13.9)  | 286 (14.3)  | 1 (4.8)   |                                                            |           |
|                           | MICU                 | 383 (8.7)   | 236 (9.9)   | 142 (7.1)   | 5 (23.8)  |                                                            |           |
|                           | Med-Surg ICU         | 2290 (51.8) | 1223 (51.1) | 1057 (52.7) | 10 (47.6) |                                                            |           |
|                           | Neuro ICU            | 95 (2.1)    | 44 (1.8)    | 50 (2.5)    | 1 (4.8)   |                                                            |           |
|                           | SICU                 | 220 (5.0)   | 140 (5.8)   | 79 (3.9)    | 1 (4.8)   |                                                            |           |
|                           | Acute Care/Floor     | 175 (4.0)   | 100 (4.2)   | 75 (3.7)    | 0 (0.0)   |                                                            |           |
|                           | Chest Pain Center    | 10 (0.2)    | 1 (0.0)     | 9 (0.4)     | 0 (0.0)   |                                                            |           |
|                           | Direct Admit         | 375 (8.5)   | 207 (8.6)   | 166 (8.3)   | 2 (9.5)   |                                                            |           |
|                           | Emergency Department | 2502 (56.6) | 1320 (55.1) | 1168 (58.2) | 14 (66.7) |                                                            |           |
| discharge_location, n (%) | Floor                | 731 (16.5)  | 415 (17.3)  | 314 (15.7)  | 2 (9.5)   | < 0.001 Chi-squared<br>(warning:<br>expected count <<br>5) |           |
|                           | ICU                  | 25 (0.6)    | 15 (0.6)    | 10 (0.5)    | 0 (0.0)   |                                                            |           |
|                           | ICU to SDU           | 36 (0.8)    | 19 (0.8)    | 17 (0.8)    | 0 (0.0)   |                                                            |           |
|                           | None                 | 5 (0.1)     | 1 (0.0)     | 4 (0.2)     | 0 (0.0)   |                                                            |           |
|                           | Operating Room       | 202 (4.6)   | 120 (5.0)   | 81 (4.0)    | 1 (4.8)   |                                                            |           |
|                           | Other                | 1 (0.0)     | 0 (0.0)     | 1 (0.0)     | 0 (0.0)   |                                                            |           |
|                           | Other Hospital       | 114 (2.6)   | 70 (2.9)    | 43 (2.1)    | 1 (4.8)   |                                                            |           |
|                           | Other ICU            | 62 (1.4)    | 31 (1.3)    | 30 (1.5)    | 1 (4.8)   |                                                            |           |
|                           | PACU                 | 3 (0.1)     | 2 (0.1)     | 1 (0.0)     | 0 (0.0)   |                                                            |           |
|                           | Recovery Room        | 36 (0.8)    | 22 (0.9)    | 14 (0.7)    | 0 (0.0)   |                                                            |           |
|                           | Step-Down Unit (SDU) | 145 (3.3)   | 72 (3.0)    | 73 (3.6)    | 0 (0.0)   |                                                            |           |
|                           | Acute Care/Floor     | 449 (10.2)  | 209 (8.7)   | 235 (11.7)  | 5 (23.8)  |                                                            |           |
|                           | Death                | 226 (5.1)   | 156 (6.5)   | 69 (3.4)    | 1 (4.8)   |                                                            |           |
|                           | Floor                | 2236 (50.6) | 1260 (52.6) | 972 (48.5)  | 4 (19.0)  |                                                            |           |
|                           | Home                 | 247 (5.6)   | 103 (4.3)   | 141 (7.0)   | 3 (14.3)  |                                                            |           |
|                           | ICU                  | 28 (0.6)    | 20 (0.8)    | 8 (0.4)     | 0 (0.0)   |                                                            |           |
|                           | None                 | 6 (0.1)     | 5 (0.2)     | 0 (0.0)     | 1 (4.8)   |                                                            |           |
| Nursing Home              | 8 (0.2)              | 5 (0.2)     | 3 (0.1)     | 0 (0.0)     |           |                                                            |           |
| Other                     | 19 (0.4)             | 14 (0.6)    | 5 (0.2)     | 0 (0.0)     |           |                                                            |           |
| Other External            | 63 (1.4)             | 44 (1.8)    | 19 (0.9)    | 0 (0.0)     |           |                                                            |           |
| Other Hospital            | 101 (2.3)            | 64 (2.7)    | 37 (1.8)    | 0 (0.0)     |           |                                                            |           |
| Other ICU                 | 141 (3.2)            | 76 (3.2)    | 63 (3.1)    | 2 (9.5)     |           |                                                            |           |
| Other Internal            | 14 (0.3)             | 8 (0.3)     | 6 (0.3)     | 0 (0.0)     |           |                                                            |           |
| Rehabilitation            | 17 (0.4)             | 3 (0.1)     | 14 (0.7)    | 0 (0.0)     |           |                                                            |           |
| Skilled Nursing Facility  | 56 (1.3)             | 27 (1.1)    | 29 (1.4)    | 0 (0.0)     |           |                                                            |           |
| Step-Down Unit (SDU)      | 499 (11.3)           | 267 (11.1)  | 229 (11.4)  | 3 (14.3)    |           |                                                            |           |
| Telemetry                 | 312 (7.1)            | 134 (5.6)   | 176 (8.8)   | 2 (9.5)     |           |                                                            |           |

(continued)

| Variable                       | Level   | Overall     | A           | B           | C         | P Test                                                     | q(FDR-BH) |
|--------------------------------|---------|-------------|-------------|-------------|-----------|------------------------------------------------------------|-----------|
| unitdischargestatus, n (%)     | Alive   | 4195 (94.9) | 2239 (93.5) | 1937 (96.6) | 19 (90.5) | < 0.001 Chi-squared<br>(warning:<br>expected count <<br>5) |           |
|                                | Expired | 226 (5.1)   | 156 (6.5)   | 69 (3.4)    | 1 (4.8)   |                                                            |           |
|                                | None    | 1 (0.0)     | 0 (0.0)     | 0 (0.0)     | 1 (4.8)   |                                                            |           |
| hospitaldischargestatus, n (%) | Alive   | 3948 (89.3) | 2080 (86.8) | 1849 (92.2) | 19 (90.5) | < 0.001 Chi-squared<br>(warning:<br>expected count <<br>5) |           |
|                                | Expired | 418 (9.5)   | 268 (11.2)  | 148 (7.4)   | 2 (9.5)   |                                                            |           |
|                                | None    | 56 (1.3)    | 47 (2.0)    | 9 (0.4)     | 0 (0.0)   |                                                            |           |

Table S14: External validation (eICU-CRD): Stage 1 Table 1b (pairwise standardized mean differences).

| Variable                                 | Level            | SMD(A,B) | SMD(A,C) | SMD(B,C)       | P q(FDR-BH) |       |
|------------------------------------------|------------------|----------|----------|----------------|-------------|-------|
| n                                        |                  |          |          |                |             |       |
| age_at_admit, mean (SD)                  |                  | -0.078   | -0.719   | -0.631 < 0.001 |             |       |
| first_dose_furosemide_eq_mg, mean (SD)   |                  | -0.263   | 0.702    | 1.139 < 0.001  |             |       |
| furosemide_eq_total_24h_mg, mean (SD)    |                  | -0.194   | 0.265    | 0.640 < 0.001  |             |       |
| minutes_icu_to_first_diuretic, mean (SD) |                  | -0.073   | -0.078   | -0.006         | 0.052       | 0.121 |
| map_nearest_mmhg, mean (SD)              |                  | 0.090    | 0.450    | 0.364          | 0.002       | 0.014 |
| cvp_nearest_mmhg, mean (SD)              |                  | -0.014   | -1.693   | -1.684         | 0.197       | 0.345 |
| creatinine_baseline_mgdl, mean (SD)      |                  | -0.267   | 6.296    | 7.030 < 0.001  |             |       |
| bun_baseline_mgdl, mean (SD)             |                  | -0.205   | 1.829    | 2.146 < 0.001  |             |       |
| sodium_baseline_meql, mean (SD)          |                  | 0.078    | -0.117   | -0.182         | 0.035       | 0.121 |
| uo_2h_ml_zero_filled, mean (SD)          |                  | 1.209    | 0.169    | -1.162 < 0.001 |             |       |
| uo_6h_ml_zero_filled, mean (SD)          |                  | 2.077    | 0.029    | -2.074 < 0.001 |             |       |
| uo_12h_ml_zero_filled, mean (SD)         |                  | 1.663    | -0.178   | -1.937 < 0.001 |             |       |
| dei_2h_zero_filled_ml_per_mg, mean (SD)  |                  | 1.153    | 0.136    | -1.137 < 0.001 |             |       |
| dei_6h_zero_filled_ml_per_mg, mean (SD)  |                  | 1.939    | -0.066   | -1.950 < 0.001 |             |       |
| dei_12h_zero_filled_ml_per_mg, mean (SD) |                  | 0.698    | -0.134   | -1.976 < 0.001 |             |       |
| icu_los_minutes, mean (SD)               |                  | 0.010    | -0.032   | -0.044         | 0.941       | 0.941 |
| hosp_los_minutes, mean (SD)              |                  | -0.033   | 0.013    | 0.063          | 0.555       | 0.648 |
| gender, n (%)                            | Female           | 0.153    | 0.368    | 0.212 < 0.001  |             |       |
|                                          | Male             |          |          |                |             |       |
| race, n (%)                              | African American | 0.234    | 0.719    | 0.875 < 0.001  |             |       |
|                                          | Asian            |          |          |                |             |       |
|                                          | Caucasian        |          |          |                |             |       |
|                                          | Hispanic         |          |          |                |             |       |
|                                          | Native American  |          |          |                |             |       |
|                                          | None             |          |          |                |             |       |
|                                          | Other/Unknown    |          |          |                |             |       |
| first_careunit, n (%)                    | CCU-CTICU        | 0.200    | 0.569    | 0.635 < 0.001  |             |       |
|                                          | CSICU            |          |          |                |             |       |
|                                          | CTICU            |          |          |                |             |       |
|                                          | Cardiac ICU      |          |          |                |             |       |
|                                          | MICU             |          |          |                |             |       |
|                                          | Med-Surg ICU     |          |          |                |             |       |
|                                          | Neuro ICU        |          |          |                |             |       |
|                                          | SICU             |          |          |                |             |       |
| admission_location, n (%)                | Acute Care/Floor | 0.145    | –        | 0.571          | 0.418       | 0.585 |

(continued)

| Variable                       | Level                | SMD(A,B) | SMD(A,C) | SMD(B,C) | P q(FDR-BH) |
|--------------------------------|----------------------|----------|----------|----------|-------------|
| discharge_location, n (%)      | Chest Pain Center    |          |          |          |             |
|                                | Direct Admit         |          |          |          |             |
|                                | Emergency Department |          |          |          |             |
|                                | Floor                |          |          |          |             |
|                                | ICU                  |          |          |          |             |
|                                | ICU to SDU           |          |          |          |             |
|                                | None                 |          |          |          |             |
|                                | Operating Room       |          |          |          |             |
|                                | Other                |          |          |          |             |
|                                | Other Hospital       |          |          |          |             |
|                                | Other ICU            |          |          |          |             |
|                                | PACU                 |          |          |          |             |
|                                | Recovery Room        |          |          |          |             |
|                                | Step-Down Unit (SDU) |          |          |          |             |
|                                | Acute Care/Floor     | 0.297    | 1.075    | 0.905    | < 0.001     |
|                                | Death                |          |          |          |             |
|                                | Floor                |          |          |          |             |
| Home                           |                      |          |          |          |             |
| ICU                            |                      |          |          |          |             |
| None                           |                      |          |          |          |             |
| Nursing Home                   |                      |          |          |          |             |
| Other                          |                      |          |          |          |             |
| Other External                 |                      |          |          |          |             |
| Other Hospital                 |                      |          |          |          |             |
| Other ICU                      |                      |          |          |          |             |
| Other Internal                 |                      |          |          |          |             |
| Rehabilitation                 |                      |          |          |          |             |
| Skilled Nursing Facility       |                      |          |          |          |             |
| Step-Down Unit (SDU)           |                      |          |          |          |             |
| Telemetry                      |                      |          |          |          |             |
| unitdischargestatus, n (%)     | Alive                | -        | 0.323    | 0.326    | < 0.001     |
|                                | Expired              |          |          |          |             |
| hospitaldischargestatus, n (%) | None                 |          |          |          |             |
|                                | Alive                | 0.195    | 0.210    | 0.122    | < 0.001     |
|                                | Expired              |          |          |          |             |
|                                | None                 |          |          |          |             |

### S3.4 In-hospital mortality

Kaplan–Meier summaries are provided in Table S15. Survival curves and multivariable Cox model branch effects are shown in Fig. S7 and Fig. S8.

Table S15: Kaplan–Meier summary by branch (eICU-CRD).

| branch_label | n    | events | median_survival_days | 7d_survival | 30d_survival |
|--------------|------|--------|----------------------|-------------|--------------|
| A            | 2395 | 272    | 366.759              | 0.904       | 0.700        |
| B            | 2006 | 149    | 57.860               | 0.943       | 0.652        |
| C            | 21   | 2      | inf                  | 0.871       | 0.871        |

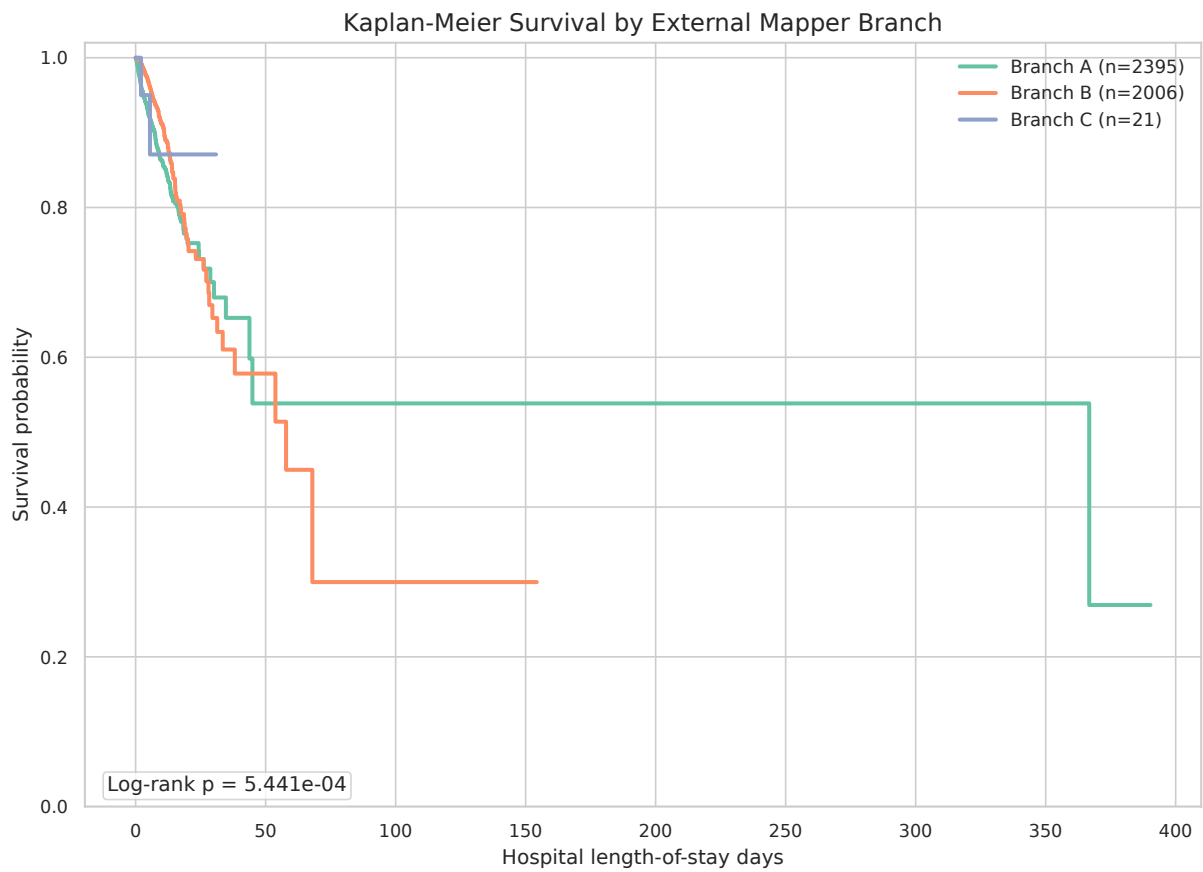

Fig. S7: Kaplan–Meier survival curves by major branch in external validation (eICU-CRD).

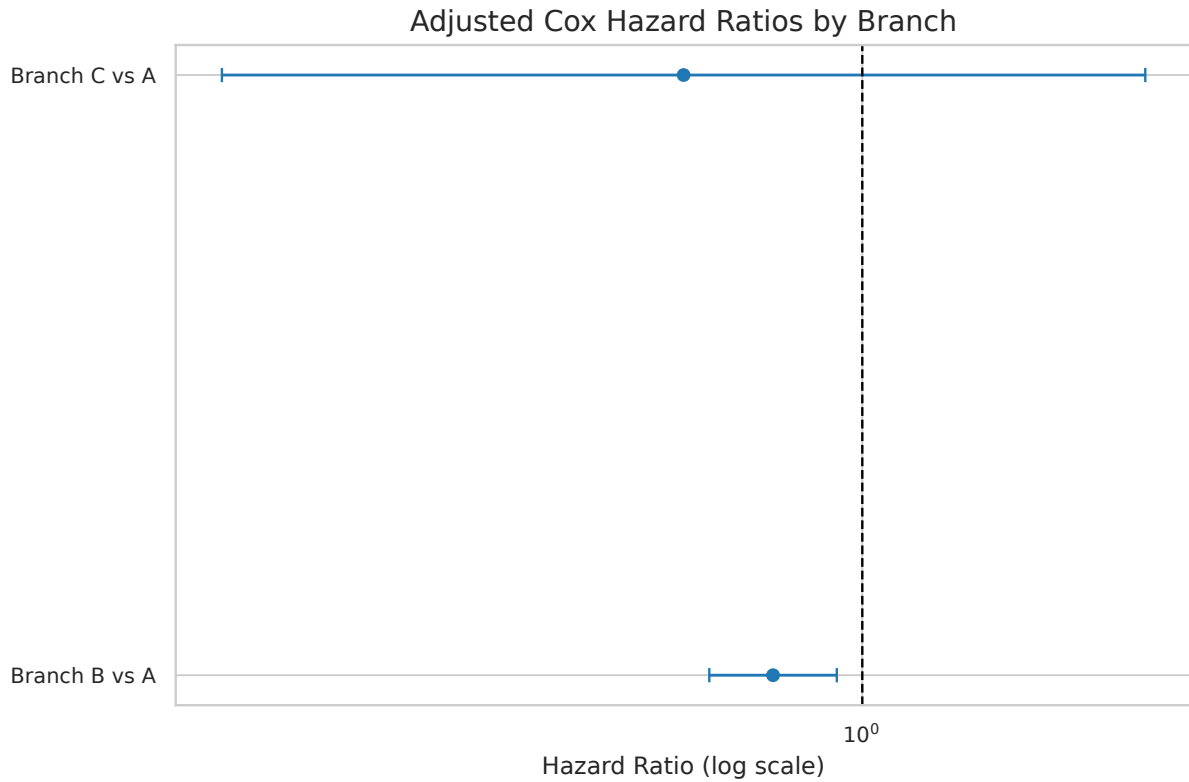

Fig. S8: Forest plot for branch effects in the multivariable Cox model (eICU-CRD external validation).

### S3.5 AKI within 48 hours (AKI48h; KDIGO creatinine proxy)

Branch-level AKI48h rates are provided in Table S16. Full adjusted odds ratios are provided in Table S27.

Table S16: AKI48h (creatinine-only KDIGO proxy) by branch (eICU-CRD).

| branch_label | n    | followup_n | aki48_n | aki48_rate | stage2plus_n | stage2plus_rate | stage3_n | stage3_rate |
|--------------|------|------------|---------|------------|--------------|-----------------|----------|-------------|
| A            | 2395 | 2219       | 518     | 0.216      | 105          | 0.044           | 78       | 0.033       |
| B            | 2006 | 1921       | 325     | 0.162      | 33           | 0.016           | 23       | 0.011       |
| C            | 21   | 20         | 6       | 0.286      | 6            | 0.286           | 6        | 0.286       |

### S3.6 Dynamic response phenotypes

Dynamic response pattern rates and median segmented DEI increments are provided in Table S17. Cumulative urine output and DEI trajectories are shown in Fig. S9.

Table S17: Dynamic response pattern rates by branch (eICU-CRD).

| branch_label | n    | primary_nonresponse_rate | tachyphylaxis_rate | dei_0_2_median | dei_2_6_median | dei_6_12_median |
|--------------|------|--------------------------|--------------------|----------------|----------------|-----------------|
| A            | 2395 | 0.927                    | 0.000              | 0.000          | 0.000          | 0.000           |
| B            | 2006 | 0.330                    | 0.082              | 7.500          | 14.688         | 10.000          |
| C            | 21   | 0.857                    | 0.000              | 0.000          | 0.000          | 0.000           |

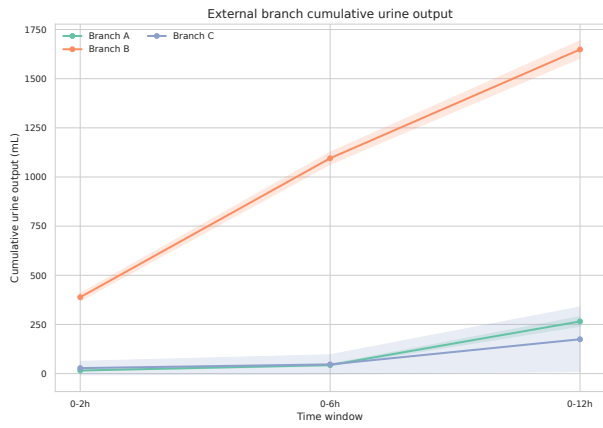

(a) Cumulative urine output

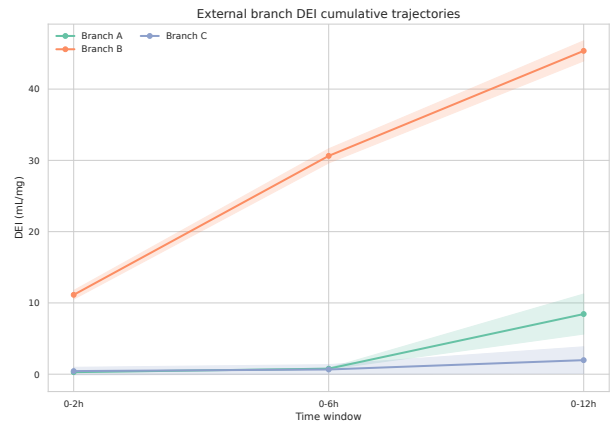

(b) Cumulative DEI

Fig. S9: Dynamic response trajectories by major branch in external validation (eICU-CRD).

### S3.7 Robustness and sensitivity analyses

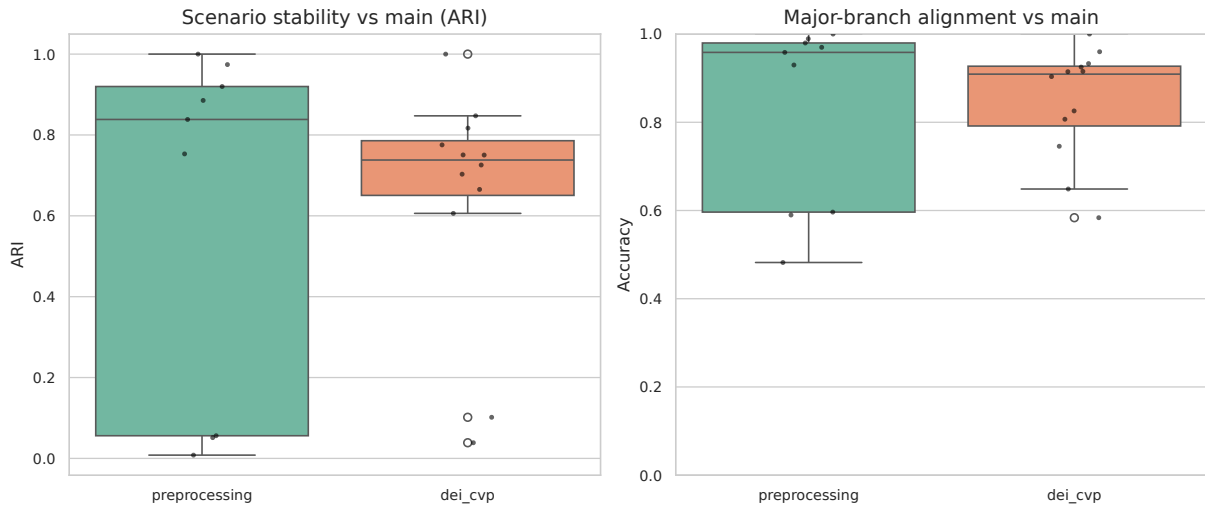

Fig. S10: Stability metrics across prespecified sensitivity scenarios in external validation (eICU-CRD).

## S4 Model Diagnostics

### S4.1 Cox proportional-hazards assumption

Schoenfeld residual-based proportional-hazards tests for the multivariable Cox models are summarized in Table S18 (MIMIC-IV) and Table S19 (eICU-CRD). The corresponding  $-\log_{10}(p)$  visual summaries are shown in Fig. S11 and Fig. S12. In the main cohort, the Schoenfeld test did not indicate a departure from the PH assumption for branch B ( $p = 0.104$ ); in external validation, the test indicated strong evidence against PH for branch B ( $p = 3.3 \times 10^{-7}$ ), consistent with a time-varying branch effect in eICU-CRD. Accordingly, Cox branch hazard ratios in external validation are interpreted as time-averaged associations over follow-up.

Table S18: Cox proportional-hazards assumption test (Schoenfeld residuals; MIMIC-IV).

| variable                 | test_statistic | p     | $-\log_2(p)$ |
|--------------------------|----------------|-------|--------------|
| age_at_admit             | 4.536          | 0.033 | 4.913        |
| branch_B                 | 2.649          | 0.104 | 3.271        |
| branch_C                 | 0.294          | 0.588 | 0.767        |
| branch_D                 | 6.878          | 0.009 | 6.840        |
| creatinine_baseline_mgdl | 0.043          | 0.835 | 0.260        |
| log_dose24               | 8.748          | 0.003 | 8.334        |
| male                     | 0.382          | 0.536 | 0.899        |
| map_nearest_mmhg         | 3.923          | 0.048 | 4.392        |

Table S19: Cox proportional-hazards assumption test (Schoenfeld residuals; eICU-CRD).

| variable                 | test_statistic | p         | -log2(p) |
|--------------------------|----------------|-----------|----------|
| age_at_admit             | 0.002          | 0.964     | 0.053    |
| branch_B                 | 26.045         | 3.335e-07 | 21.516   |
| branch_C                 | 0.852          | 0.356     | 1.490    |
| creatinine_baseline_mgdl | 8.857          | 0.003     | 8.420    |
| log_dose24               | 0.019          | 0.890     | 0.168    |
| male                     | 0.317          | 0.574     | 0.802    |
| map_nearest_mmhg         | 0.011          | 0.915     | 0.129    |

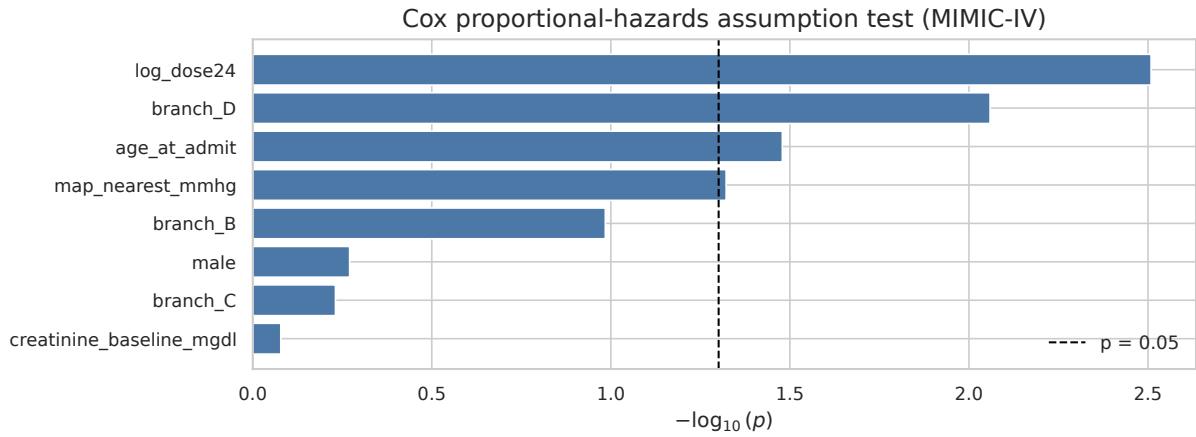

Fig. S11: Cox proportional-hazards assumption test summary for the main cohort (MIMIC-IV).

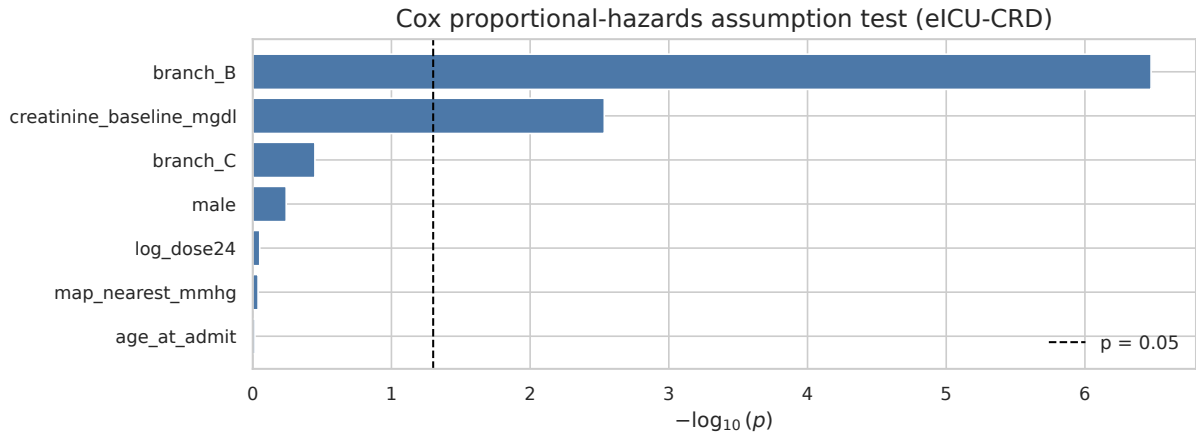

Fig. S12: Cox proportional-hazards assumption test summary for external validation (eICU-CRD).

## S4.2 Logistic calibration

Calibration metrics based on 5-fold out-of-fold predictions are reported in Table S20 (MIMIC-IV) and Table S21 (eICU-CRD). Decile-based calibration curves are shown in Fig. S13 and Fig. S14.

Table S20: Logistic calibration metrics (out-of-fold predictions; MIMIC-IV).

| Model         | AUC   | Brier | CITL       | Calibration slope | Branch levels (incl. ref.) | CV folds |
|---------------|-------|-------|------------|-------------------|----------------------------|----------|
| Base          | 0.708 | 0.077 | -4.538e-05 | 0.961             | 1                          | 5        |
| Base + Branch | 0.731 | 0.075 | 0.002      | 0.956             | 4                          | 5        |

Table S21: Logistic calibration metrics (out-of-fold predictions; eICU-CRD).

| Model         | AUC   | Brier | CITL       | Calibration slope | Branch levels (incl. ref.) | CV folds |
|---------------|-------|-------|------------|-------------------|----------------------------|----------|
| Base          | 0.627 | 0.085 | -8.345e-04 | 0.875             | 1                          | 5        |
| Base + Branch | 0.637 | 0.085 | 0.001      | 0.882             | 3                          | 5        |

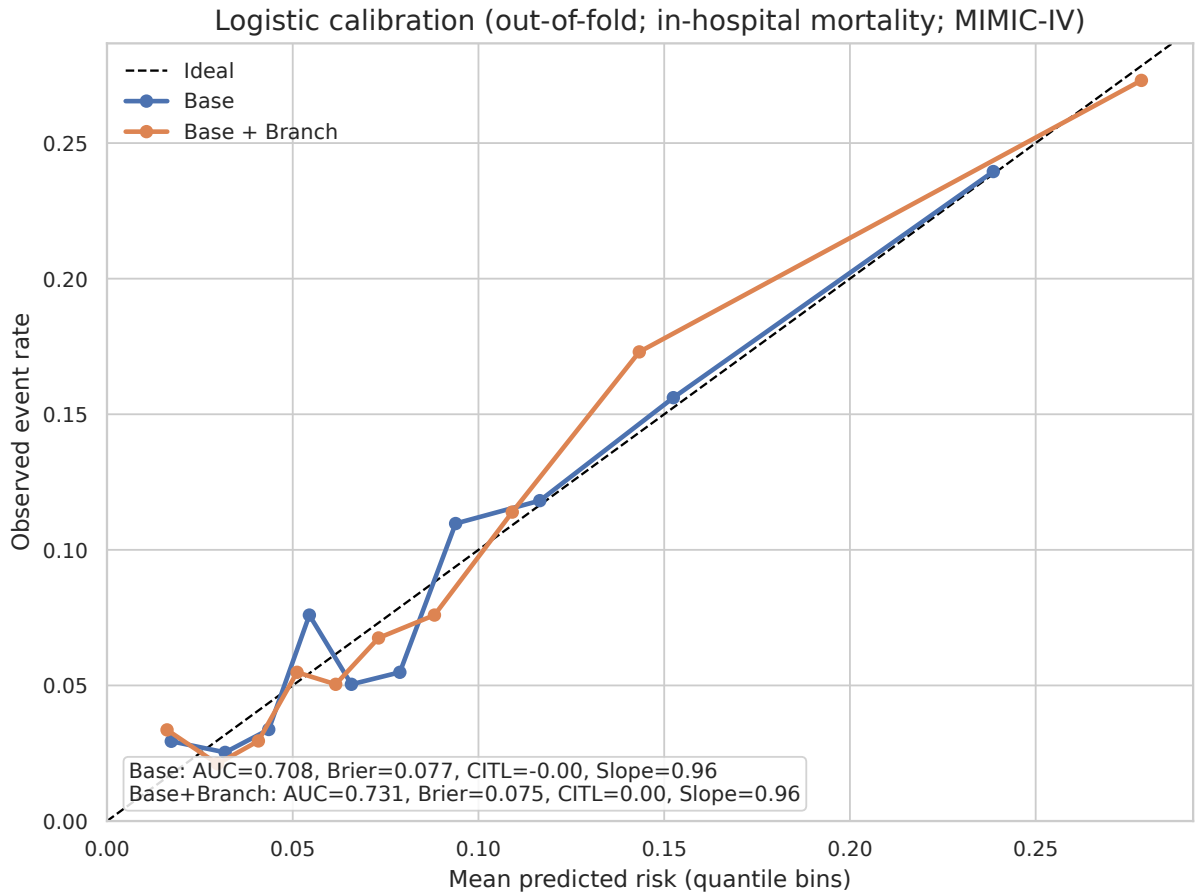

Fig. S13: Logistic calibration for in-hospital mortality in the main cohort (MIMIC-IV; out-of-fold predictions).

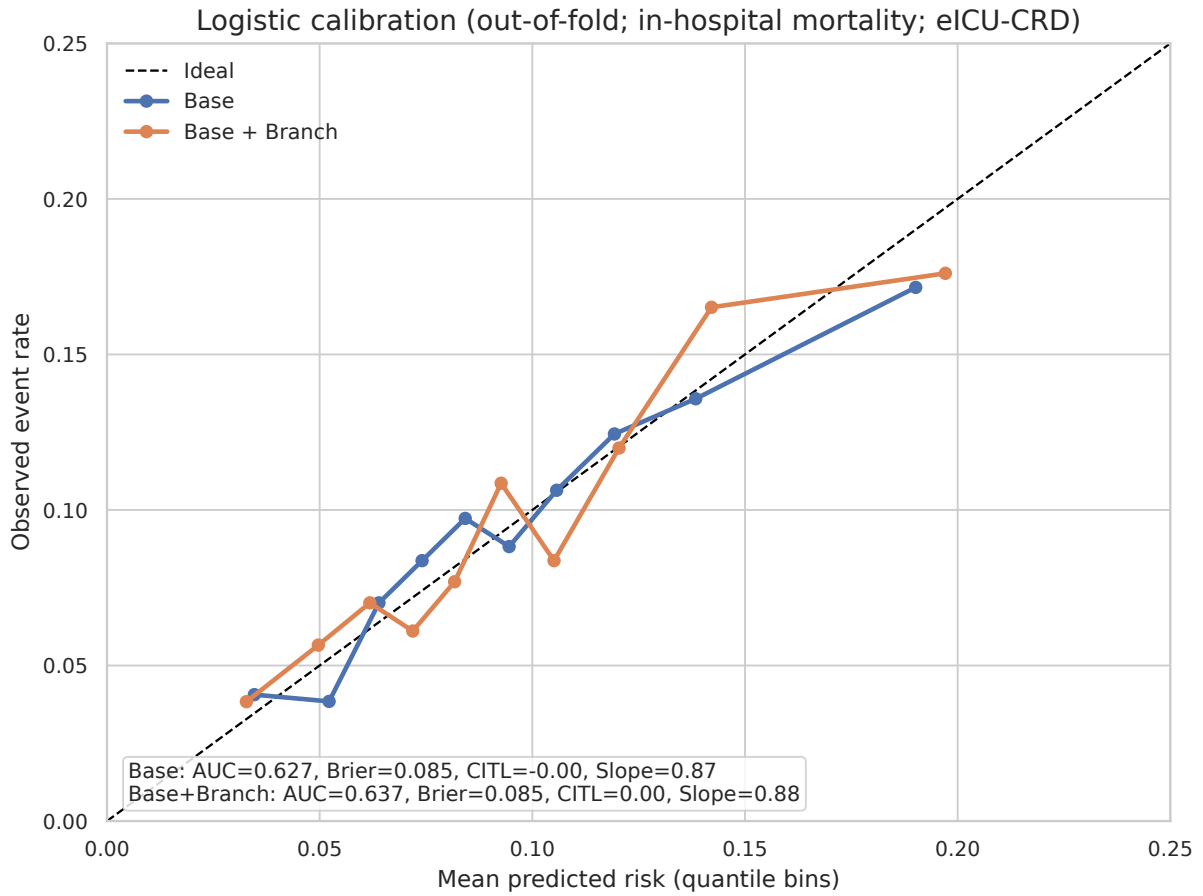

Fig. S14: Logistic calibration for in-hospital mortality in external validation (eICU-CRD; out-of-fold predictions).

## S5 Supplementary Tables: Full Model Outputs

### S5.1 Main cohort (MIMIC-IV)

Table S22: Multivariable Cox model coefficients for in-hospital mortality (MIMIC-IV).

| Variable                 | Coef   | SE    | HR    | HR L95 | HR U95 | z      | P         |
|--------------------------|--------|-------|-------|--------|--------|--------|-----------|
| age_at_admit             | 0.036  | 0.005 | 1.036 | 1.026  | 1.047  | 6.712  | 1.918e-11 |
| male                     | 0.030  | 0.127 | 1.031 | 0.804  | 1.321  | 0.240  | 0.810     |
| creatinine_baseline_mgdl | 0.081  | 0.068 | 1.085 | 0.950  | 1.238  | 1.200  | 0.230     |
| map_nearest_mmhg         | -0.010 | 0.004 | 0.990 | 0.981  | 0.998  | -2.440 | 0.015     |
| log_dose24               | 0.248  | 0.066 | 1.281 | 1.125  | 1.459  | 3.729  | 1.926e-04 |
| branch_B                 | -0.241 | 0.182 | 0.786 | 0.550  | 1.122  | -1.327 | 0.184     |
| branch_C                 | 0.821  | 0.248 | 2.272 | 1.398  | 3.692  | 3.311  | 9.292e-04 |
| branch_D                 | 1.452  | 0.265 | 4.270 | 2.541  | 7.176  | 5.481  | 4.241e-08 |

Table S23: Logistic regression odds ratios for in-hospital mortality (MIMIC-IV).

| Variable                 | Model            | OR    | OR L95    | OR U95 | P         |
|--------------------------|------------------|-------|-----------|--------|-----------|
| const                    | base             | 0.002 | 3.460e-04 | 0.008  | 5.977e-15 |
| age_at_admit             | base             | 1.042 | 1.028     | 1.056  | 1.320e-09 |
| male                     | base             | 0.988 | 0.734     | 1.329  | 0.934     |
| creatinine_baseline_mgdl | base             | 1.273 | 1.100     | 1.473  | 0.001     |
| map_nearest_mmhg         | base             | 0.985 | 0.974     | 0.995  | 0.003     |
| log_dose24               | base             | 1.451 | 1.257     | 1.674  | 3.558e-07 |
| const                    | base_plus_branch | 0.001 | 2.316e-04 | 0.006  | 2.418e-15 |
| age_at_admit             | base_plus_branch | 1.044 | 1.030     | 1.058  | 5.246e-10 |
| male                     | base_plus_branch | 1.087 | 0.803     | 1.470  | 0.590     |
| creatinine_baseline_mgdl | base_plus_branch | 1.102 | 0.926     | 1.311  | 0.273     |
| map_nearest_mmhg         | base_plus_branch | 0.987 | 0.977     | 0.997  | 0.012     |
| log_dose24               | base_plus_branch | 1.500 | 1.267     | 1.777  | 2.619e-06 |
| branch_B                 | base_plus_branch | 0.772 | 0.485     | 1.229  | 0.276     |
| branch_C                 | base_plus_branch | 2.607 | 1.402     | 4.848  | 0.002     |
| branch_D                 | base_plus_branch | 4.831 | 2.551     | 9.149  | 1.331e-06 |

Table S24: Adjusted odds ratios for AKI48h (MIMIC-IV).

| Variable                 | OR    | OR L95 | OR U95 | P         |
|--------------------------|-------|--------|--------|-----------|
| const                    | 0.075 | 0.029  | 0.195  | 1.082e-07 |
| age_at_admit             | 1.002 | 0.995  | 1.010  | 0.523     |
| male                     | 0.913 | 0.748  | 1.114  | 0.370     |
| creatinine_baseline_mgdl | 1.403 | 1.233  | 1.596  | 2.635e-07 |
| map_nearest_mmhg         | 1.000 | 0.994  | 1.007  | 0.925     |
| log_dose24               | 1.206 | 1.078  | 1.349  | 0.001     |
| branch_B                 | 0.525 | 0.379  | 0.726  | 9.924e-05 |
| branch_C                 | 1.137 | 0.688  | 1.879  | 0.616     |
| branch_D                 | 1.227 | 0.684  | 2.201  | 0.493     |

## S5.2 External validation (eICU-CRD)

Table S25: Multivariable Cox model coefficients for in-hospital mortality (eICU-CRD).

| Variable                 | Coef   | SE    | HR    | HR L95 | HR U95 | z      | P         |
|--------------------------|--------|-------|-------|--------|--------|--------|-----------|
| age_at_admit             | 0.020  | 0.004 | 1.021 | 1.014  | 1.028  | 5.854  | 4.787e-09 |
| male                     | -0.006 | 0.090 | 0.994 | 0.833  | 1.186  | -0.065 | 0.948     |
| creatinine_baseline_mgdl | 0.100  | 0.045 | 1.106 | 1.013  | 1.207  | 2.247  | 0.025     |
| map_nearest_mmhg         | -0.012 | 0.003 | 0.988 | 0.983  | 0.993  | -4.494 | 6.985e-06 |
| log_dose24               | 0.080  | 0.065 | 1.084 | 0.954  | 1.230  | 1.239  | 0.216     |
| branch_B                 | -0.254 | 0.093 | 0.775 | 0.647  | 0.930  | -2.743 | 0.006     |
| branch_C                 | -0.509 | 0.671 | 0.601 | 0.161  | 2.240  | -0.759 | 0.448     |

Table S26: Logistic regression odds ratios for in-hospital mortality (eICU-CRD).

| Variable                 | Model            | OR    | OR L95 | OR U95 | P         |
|--------------------------|------------------|-------|--------|--------|-----------|
| const                    | base             | 0.050 | 0.018  | 0.140  | 1.277e-08 |
| age_at_admit             | base             | 1.019 | 1.011  | 1.027  | 6.234e-06 |
| male                     | base             | 0.975 | 0.793  | 1.199  | 0.812     |
| creatinine_baseline_mgdl | base             | 1.175 | 1.076  | 1.283  | 3.376e-04 |
| map_nearest_mmhg         | base             | 0.980 | 0.974  | 0.986  | 6.041e-11 |
| log_dose24               | base             | 1.227 | 1.054  | 1.429  | 0.008     |
| const                    | base_plus_branch | 0.063 | 0.022  | 0.178  | 1.817e-07 |
| age_at_admit             | base_plus_branch | 1.018 | 1.010  | 1.027  | 1.304e-05 |
| male                     | base_plus_branch | 0.992 | 0.805  | 1.222  | 0.938     |
| creatinine_baseline_mgdl | base_plus_branch | 1.202 | 1.082  | 1.336  | 6.318e-04 |
| map_nearest_mmhg         | base_plus_branch | 0.980 | 0.974  | 0.986  | 1.741e-10 |
| log_dose24               | base_plus_branch | 1.189 | 1.022  | 1.385  | 0.025     |
| branch_B                 | base_plus_branch | 0.700 | 0.565  | 0.868  | 0.001     |
| branch_C                 | base_plus_branch | 0.294 | 0.056  | 1.553  | 0.149     |

Table S27: Adjusted odds ratios for AKI48h (eICU-CRD).

| Variable                 | OR    | OR L95 | OR U95 | P         |
|--------------------------|-------|--------|--------|-----------|
| const                    | 0.075 | 0.035  | 0.159  | 1.343e-11 |
| age_at_admit             | 1.003 | 0.997  | 1.008  | 0.335     |
| male                     | 0.899 | 0.768  | 1.052  | 0.183     |
| creatinine_baseline_mgdl | 1.414 | 1.306  | 1.530  | 1.331e-17 |
| map_nearest_mmhg         | 1.002 | 0.998  | 1.006  | 0.380     |
| log_dose24               | 1.133 | 1.008  | 1.274  | 0.037     |
| branch_B                 | 0.743 | 0.634  | 0.871  | 2.440e-04 |
| branch_C                 | 0.118 | 0.038  | 0.367  | 2.190e-04 |

## S6 Supplementary Appendix: Reference Lists (MIMIC-IV)

### S6.1 Itemid reference list

Table S28: MIMIC-IV itemid reference list used in feature extraction.

| source_table    | variable_group                   | itemid label                               | linksto      | category            | unitname |
|-----------------|----------------------------------|--------------------------------------------|--------------|---------------------|----------|
| icu_d_items     | iv_loop_diuretic_<br>inputevents | 221794 Furosemide (Lasix)                  | inputevents  | Medications         | mg       |
| icu_d_items     | iv_loop_diuretic_<br>inputevents | 228340 Furosemide (Lasix) 250/50           | inputevents  | Medications         | mg       |
| icu_d_items     | iv_loop_diuretic_<br>inputevents | 229639 Bumetanide (Bumex)                  | inputevents  | Medications         | mg       |
| icu_d_items     | urine_output_<br>outputevents    | 226557 R Ureteral Stent                    | outputevents | Output              | mL       |
| icu_d_items     | urine_output_<br>outputevents    | 226558 L Ureteral Stent                    | outputevents | Output              | mL       |
| icu_d_items     | urine_output_<br>outputevents    | 226559 Foley                               | outputevents | Output              | mL       |
| icu_d_items     | urine_output_<br>outputevents    | 226560 Void                                | outputevents | Output              | mL       |
| icu_d_items     | urine_output_<br>outputevents    | 226561 Condom Cath                         | outputevents | Output              | mL       |
| icu_d_items     | urine_output_<br>outputevents    | 226563 Suprapubic                          | outputevents | Output              | mL       |
| icu_d_items     | urine_output_<br>outputevents    | 226564 R Nephrostomy                       | outputevents | Output              | mL       |
| icu_d_items     | urine_output_<br>outputevents    | 226565 L Nephrostomy                       | outputevents | Output              | mL       |
| icu_d_items     | urine_output_<br>outputevents    | 226566 Urine and GU Irrigant Out           | outputevents | Output              | mL       |
| icu_d_items     | urine_output_<br>outputevents    | 226567 Straight Cath                       | outputevents | Output              | mL       |
| icu_d_items     | urine_output_<br>outputevents    | 226584 Ileoconduit                         | outputevents | Output              | mL       |
| icu_d_items     | urine_output_<br>outputevents    | 226627 OR Urine                            | outputevents | Output              | mL       |
| icu_d_items     | urine_output_<br>outputevents    | 226631 PACU Urine                          | outputevents | Output              | mL       |
| icu_d_items     | urine_output_<br>outputevents    | 227489 GU Irrigant/Urine Volume<br>Out     | outputevents | Output              | mL       |
| icu_d_items     | gu_irrigant_in_<br>outputevents  | 227488 GU Irrigant Volume In               | outputevents | Output              | mL       |
| icu_d_items     | map_chartevents                  | 220052 Arterial Blood Pressure<br>mean     | chartevents  | Routine Vital Signs | mmHg     |
| icu_d_items     | map_chartevents                  | 220181 Non Invasive Blood<br>Pressure mean | chartevents  | Routine Vital Signs | mmHg     |
| icu_d_items     | cvp_chartevents                  | 220074 Central Venous Pressure             | chartevents  | Hemodynamics        | mmHg     |
| hosp_d_labitems | creatinine_labevents             | 50912 Creatinine                           |              | Chemistry           |          |
| hosp_d_labitems | creatinine_labevents             | 52546 Creatinine                           |              | Chemistry           |          |
| hosp_d_labitems | bun_labevents                    | 51006 Urea Nitrogen                        |              | Chemistry           |          |
| hosp_d_labitems | bun_labevents                    | 52647 Urea Nitrogen                        |              | Chemistry           |          |
| hosp_d_labitems | sodium_labevents                 | 50983 Sodium                               |              | Chemistry           |          |
| hosp_d_labitems | sodium_labevents                 | 52623 Sodium                               |              | Chemistry           |          |
| hosp_d_labitems | ntprobnp_labevents               | 50963 NTproBNP                             |              | Chemistry           |          |

## S6.2 ICD-9 code reference list

Table S29: MIMIC-IV ICD code reference list used in cohort construction.

| code_group                   | icd_code | long_title                                                                                                                                           |
|------------------------------|----------|------------------------------------------------------------------------------------------------------------------------------------------------------|
| acute_hf_icd9                | 42821    | Acute systolic heart failure                                                                                                                         |
| acute_hf_icd9                | 42831    | Acute diastolic heart failure                                                                                                                        |
| acute_hf_icd9                | 42843    | Acute on chronic combined systolic and diastolic heart failure                                                                                       |
| acute_hf_icd9                | 42833    | Acute on chronic diastolic heart failure                                                                                                             |
| acute_hf_icd9                | 42823    | Acute on chronic systolic heart failure                                                                                                              |
| acute_hf_icd9                | 42841    | Acute combined systolic and diastolic heart failure                                                                                                  |
| sepsis_icd9_exclusion        | 0382     | Pneumococcal septicemia [Streptococcus pneumoniae septicemia]                                                                                        |
| sepsis_icd9_exclusion        | 03843    | Septicemia due to pseudomonas                                                                                                                        |
| sepsis_icd9_exclusion        | 03842    | Septicemia due to escherichia coli [E. coli]                                                                                                         |
| sepsis_icd9_exclusion        | 03849    | Other septicemia due to gram-negative organisms                                                                                                      |
| sepsis_icd9_exclusion        | 67022    | Puerperal sepsis, delivered, with mention of postpartum complication                                                                                 |
| sepsis_icd9_exclusion        | 77181    | Septicemia [sepsis] of newborn                                                                                                                       |
| sepsis_icd9_exclusion        | 0223     | Anthrax septicemia                                                                                                                                   |
| sepsis_icd9_exclusion        | 03841    | Septicemia due to hemophilus influenzae [H. influenzae]                                                                                              |
| sepsis_icd9_exclusion        | 0389     | Unspecified septicemia                                                                                                                               |
| sepsis_icd9_exclusion        | 0545     | Herpetic septicemia                                                                                                                                  |
| sepsis_icd9_exclusion        | 78552    | Septic shock                                                                                                                                         |
| sepsis_icd9_exclusion        | 99591    | Sepsis                                                                                                                                               |
| sepsis_icd9_exclusion        | 03812    | Methicillin resistant Staphylococcus aureus septicemia                                                                                               |
| sepsis_icd9_exclusion        | 03810    | Staphylococcal septicemia, unspecified                                                                                                               |
| sepsis_icd9_exclusion        | 67024    | Puerperal sepsis, postpartum condition or complication                                                                                               |
| sepsis_icd9_exclusion        | 03819    | Other staphylococcal septicemia                                                                                                                      |
| sepsis_icd9_exclusion        | 0383     | Septicemia due to anaerobes                                                                                                                          |
| sepsis_icd9_exclusion        | 0388     | Other specified septicemias                                                                                                                          |
| sepsis_icd9_exclusion        | 67020    | Puerperal sepsis, unspecified as to episode of care or not applicable                                                                                |
| sepsis_icd9_exclusion        | 0031     | Salmonella septicemia                                                                                                                                |
| sepsis_icd9_exclusion        | 0380     | Streptococcal septicemia                                                                                                                             |
| sepsis_icd9_exclusion        | 03811    | Methicillin susceptible Staphylococcus aureus septicemia                                                                                             |
| sepsis_icd9_exclusion        | 03840    | Septicemia due to gram-negative organism, unspecified                                                                                                |
| sepsis_icd9_exclusion        | 03844    | Septicemia due to serratia                                                                                                                           |
| sepsis_icd9_exclusion        | 99592    | Severe sepsis                                                                                                                                        |
| esrd_dialysis_icd9_exclusion | 40413    | Hypertensive heart and chronic kidney disease, benign, with heart failure and chronic kidney disease stage V or end stage renal disease              |
| esrd_dialysis_icd9_exclusion | 40311    | Hypertensive chronic kidney disease, benign, with chronic kidney disease stage V or end stage renal disease                                          |
| esrd_dialysis_icd9_exclusion | 40391    | Hypertensive chronic kidney disease, unspecified, with chronic kidney disease stage V or end stage renal disease                                     |
| esrd_dialysis_icd9_exclusion | V4511    | Renal dialysis status                                                                                                                                |
| esrd_dialysis_icd9_exclusion | V4512    | Noncompliance with renal dialysis                                                                                                                    |
| esrd_dialysis_icd9_exclusion | V568     | Encounter for other dialysis                                                                                                                         |
| esrd_dialysis_icd9_exclusion | 40492    | Hypertensive heart and chronic kidney disease, unspecified, without heart failure and with chronic kidney disease stage V or end stage renal disease |
| esrd_dialysis_icd9_exclusion | V451     | Renal dialysis status                                                                                                                                |
| esrd_dialysis_icd9_exclusion | 40402    | Hypertensive heart and chronic kidney disease, malignant, without heart failure and with chronic kidney disease stage V or end stage renal disease   |
| esrd_dialysis_icd9_exclusion | 40403    | Hypertensive heart and chronic kidney disease, malignant, with heart failure and with chronic kidney disease stage V or end stage renal disease      |
| esrd_dialysis_icd9_exclusion | 40412    | Hypertensive heart and chronic kidney disease, benign, without heart failure and with chronic kidney disease stage V or end stage renal disease      |
| esrd_dialysis_icd9_exclusion | 40493    | Hypertensive heart and chronic kidney disease, unspecified, with heart failure and chronic kidney disease stage V or end stage renal disease         |
| esrd_dialysis_icd9_exclusion | 5856     | End stage renal disease                                                                                                                              |
| esrd_dialysis_icd9_exclusion | V560     | Encounter for extracorporeal dialysis                                                                                                                |

(continued)

---

| code_group                   | icd_code | long_title                                                                                                     |
|------------------------------|----------|----------------------------------------------------------------------------------------------------------------|
| esrd_dialysis_icd9_exclusion | V5631    | Encounter for adequacy testing for hemodialysis                                                                |
| esrd_dialysis_icd9_exclusion | V5632    | Encounter for adequacy testing for peritoneal dialysis                                                         |
| esrd_dialysis_icd9_exclusion | 40301    | Hypertensive chronic kidney disease, malignant, with chronic kidney disease stage V or end stage renal disease |

---
